# Supplementary material for: Crystal structure of 1-(2,4,6-trichlorobenzoyloxy) benzotriazole (TCB-OBt): observation of uncommon intermolecular oxygen–oxygen interaction and synthetic application in amidation
Source: Royal Society of Chemistry journal article supplement (doi:10.1039/d1nj04048k), 2021-01-01
Supplement: d1nj04048k1.pdf [file d1nj04048k1.pdf]

## **Electronic Supporting Information (ESI)**

### **Crystal Structure of 1-(2,4,6-Trichlorobenzoyloxy) Benzotriazole (TCB-OBt): Observation of uncommon intermolecular oxygen-oxygen interaction and synthetic application in amidation**

Gobinda Dolai, Sayanta Roy, Srijit Sen, Rajat Subhra Giri and Bhubaneswar Mandal\*

Department of Chemistry, Laboratory of Peptide and Amyloid Research, Indian Institute of Technology Guwahati, Assam- 781039, India.

E-mail: [bmandal@iitg.ernet.in](mailto:bmandal@iitg.ernet.in)

## Table of contents

| <b>Sl. No</b> | <b>Contents</b>                                                                                         | <b>Page no</b> |
|---------------|---------------------------------------------------------------------------------------------------------|----------------|
| 1.            | Supramolecular arrangement of TCB-OBt                                                                   | S3             |
| 2.            | Chemical & optimized structure, HOMO-LUMO energy gap of TCB-(N)-OBt                                     | S4             |
| 3.            | Crystallographic refinement details for TCB-OBt                                                         | S5             |
| 4.            | NMR ( $^1\text{H}$ and $^{13}\text{C}$ ), Mass spectra, FT-IR spectra, and HPLC chromatogram of TCB-OBt | S6-S8          |
| 5.            | NMR ( $^1\text{H}$ and $^{13}\text{C}$ ) and Mass spectra of side product                               | S9-S10         |
| 6.            | NMR ( $^1\text{H}$ and $^{13}\text{C}$ ) and Mass spectra of isolated intermediate                      | S11-S12        |
| 7.            | NMR ( $^1\text{H}$ and $^{13}\text{C}$ ) and Mass spectra of Amides                                     | S12-S33        |

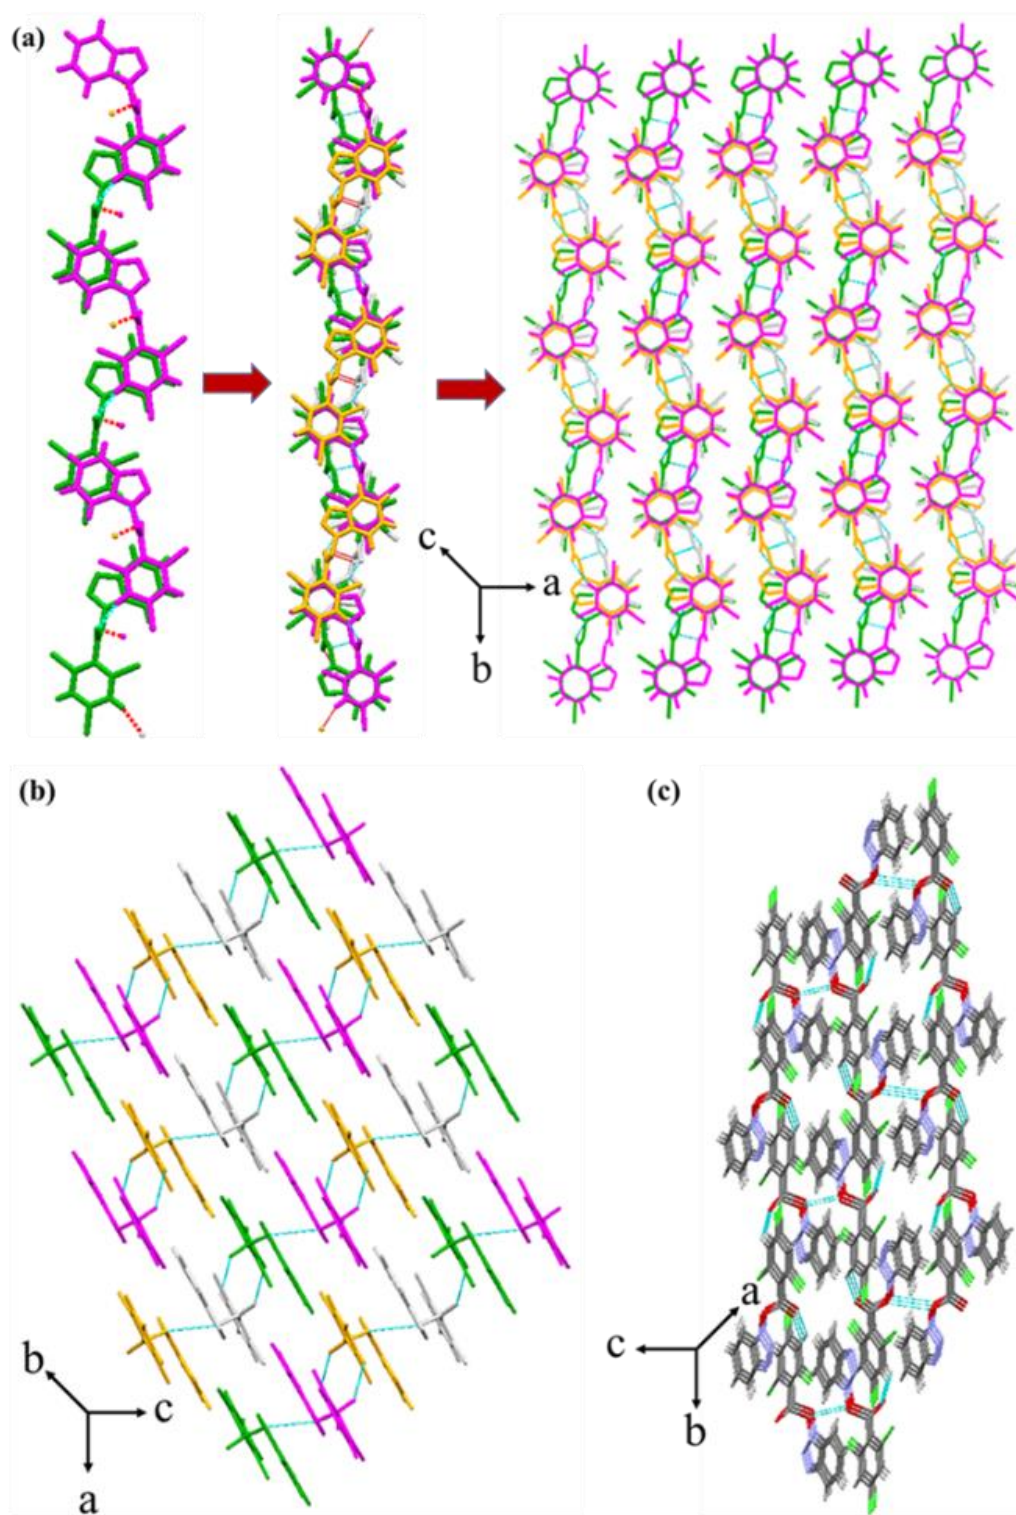

**Figure. S1** (a) Supramolecular helical architecture formation through non-covalent  $\pi$ - $\pi$  stacking interaction, oxygen-oxygen interaction, and aromatic C-H...O interaction, (b) supramolecular packing like zigzag manner along c-axis, (c) grid-like supramolecular architecture along b-axis in higher-order self-assembly.

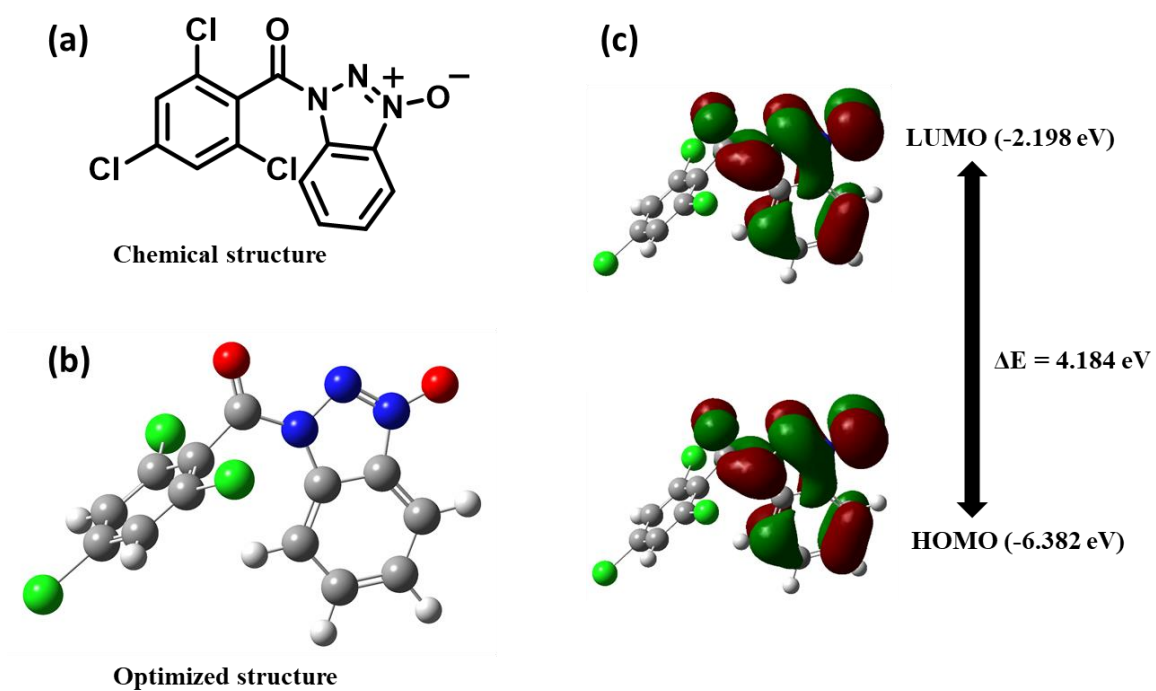

**Figure. S2** (a) Chemical structure of TCB-(N)-OBt, (b) Optimized structure TCB-(N)-OBt, (c) HOMO and LUMO molecular orbitals and energy gap of the molecule TCB-OBt, respectively.

**Table S1. Crystallographic refinement details for TCB-OBt**

| Parameters                            | TCB-OBt                                                                      |
|---------------------------------------|------------------------------------------------------------------------------|
| Formula                               | C <sub>13</sub> H <sub>6</sub> Cl <sub>3</sub> N <sub>3</sub> O <sub>2</sub> |
| Fw                                    | 342.56                                                                       |
| Crystal system                        | Monoclinic                                                                   |
| Space group                           | <i>P2(1)/n</i>                                                               |
| a/Å                                   | 10.0723(6)                                                                   |
| b/Å                                   | 13.1809(9)                                                                   |
| c/Å                                   | 10.5798(8)                                                                   |
| $\alpha$ /°                           | 90.00                                                                        |
| $\beta$ /°                            | 90.957(3)                                                                    |
| $\gamma$ /°                           | 90.00                                                                        |
| V/Å <sup>3</sup>                      | 1404.40(17)                                                                  |
| Z                                     | 4                                                                            |
| D <sub>c</sub> /g cm <sup>-3</sup>    | 1.620                                                                        |
| $\mu$ Mo K $\alpha$ /mm <sup>-1</sup> | 0.658                                                                        |
| F000                                  | 688                                                                          |
| T/K                                   | 296(2)                                                                       |
| $\theta$ max.                         | 25.00                                                                        |
| Total no. of reflections              | 13230                                                                        |
| Independent reflections               | 2452                                                                         |
| Observed reflections                  | 2112                                                                         |
| Parameters refined                    | 190                                                                          |
| R <sub>1</sub> , I > 2 $\sigma$ (I)   | 0.0368                                                                       |
| wR <sub>2</sub> , I > 2 $\sigma$ (I)  | 0.1227                                                                       |
| GOF ( <i>F</i> <sup>2</sup> )         | 0.968                                                                        |
| CCDC No.                              | 2102031                                                                      |

## 2. NMR ( $^1\text{H}$ and $^{13}\text{C}$ ) and Mass spectra of TCBOXY:

GD-SS-TCB-OBT-1-1H  
GD-SS-TCB-OBT-1-1H

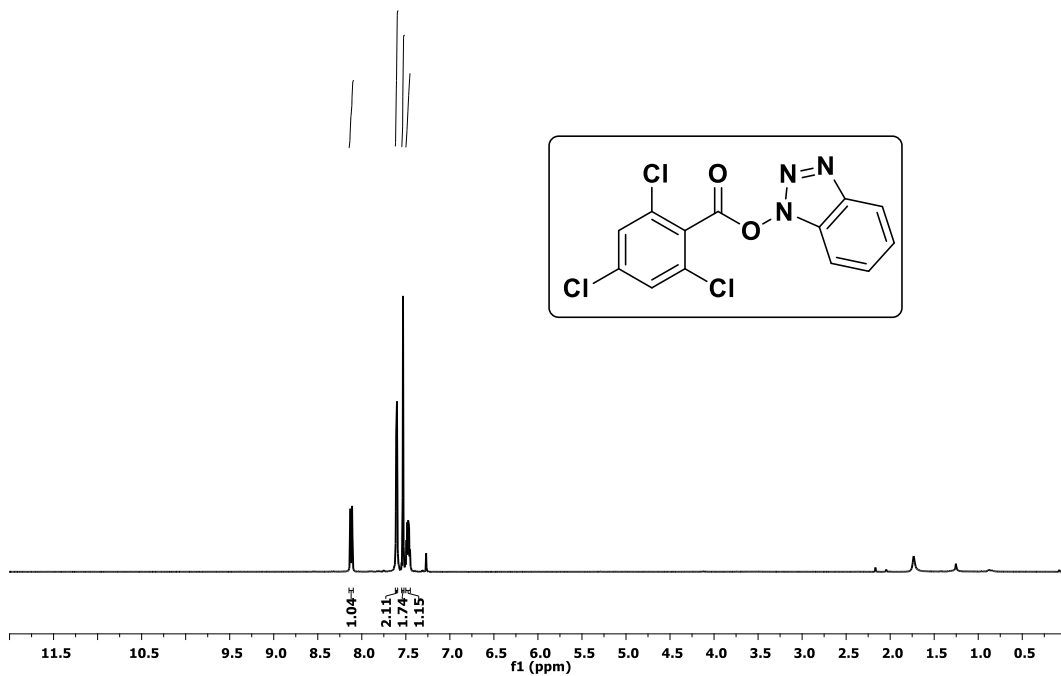

Figure S3:  $^1\text{H}$  NMR spectra of TCB-OBt

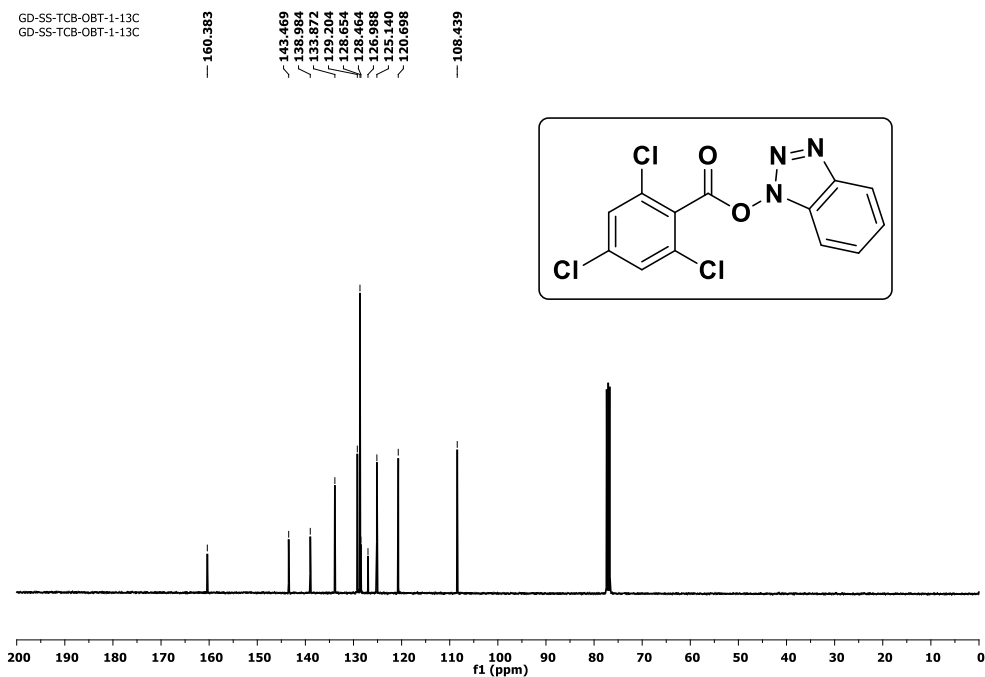

Figure S4:  $^{13}\text{C}$  NMR spectra of TCB-OBt

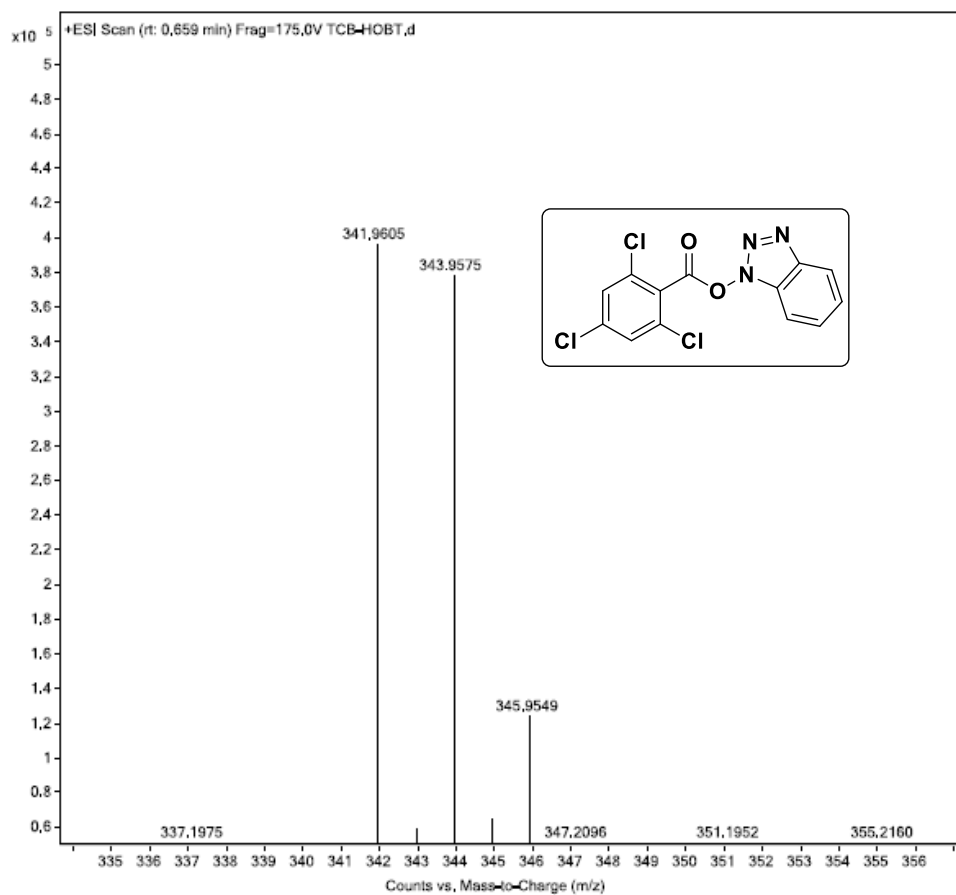

Figure S5: ESI-MASS spectra of spectra of TCB-OBt

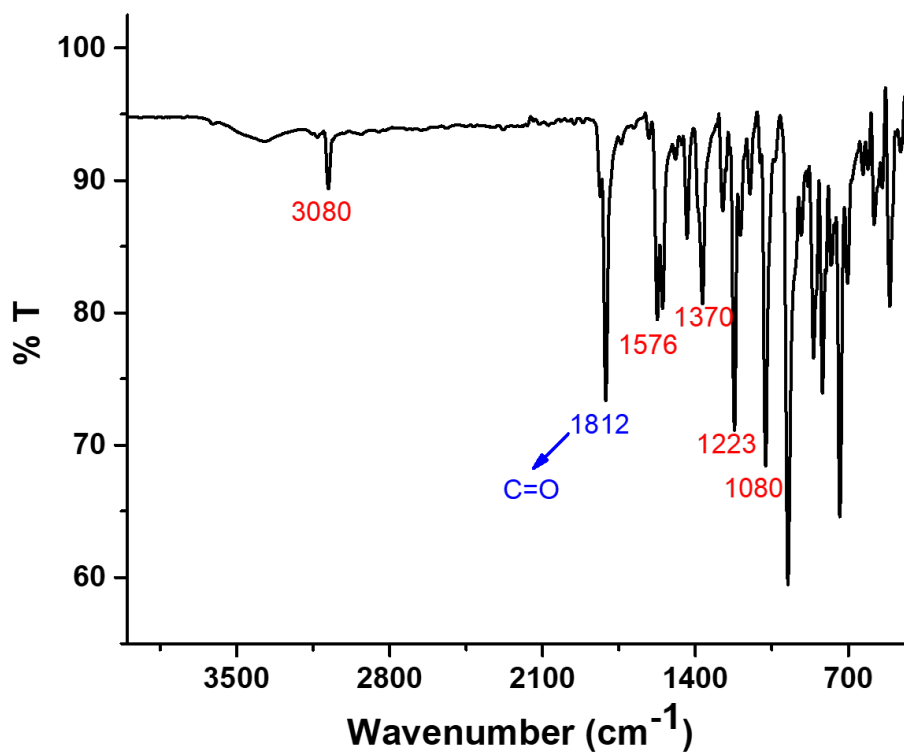

Figure S6: FT-IR spectra of TCB-OBt

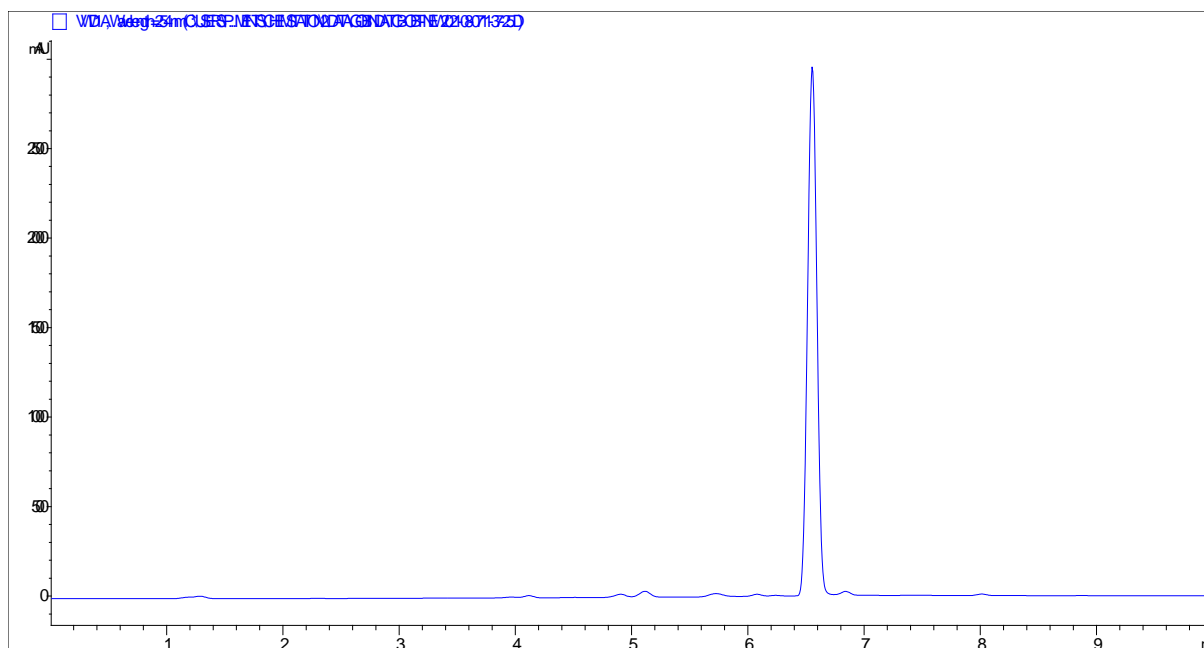

**Figure S7:** HPLC chromatogram of TCB-OBt, first day of synthesis. (retention time  $R_t = 6.554$  min)

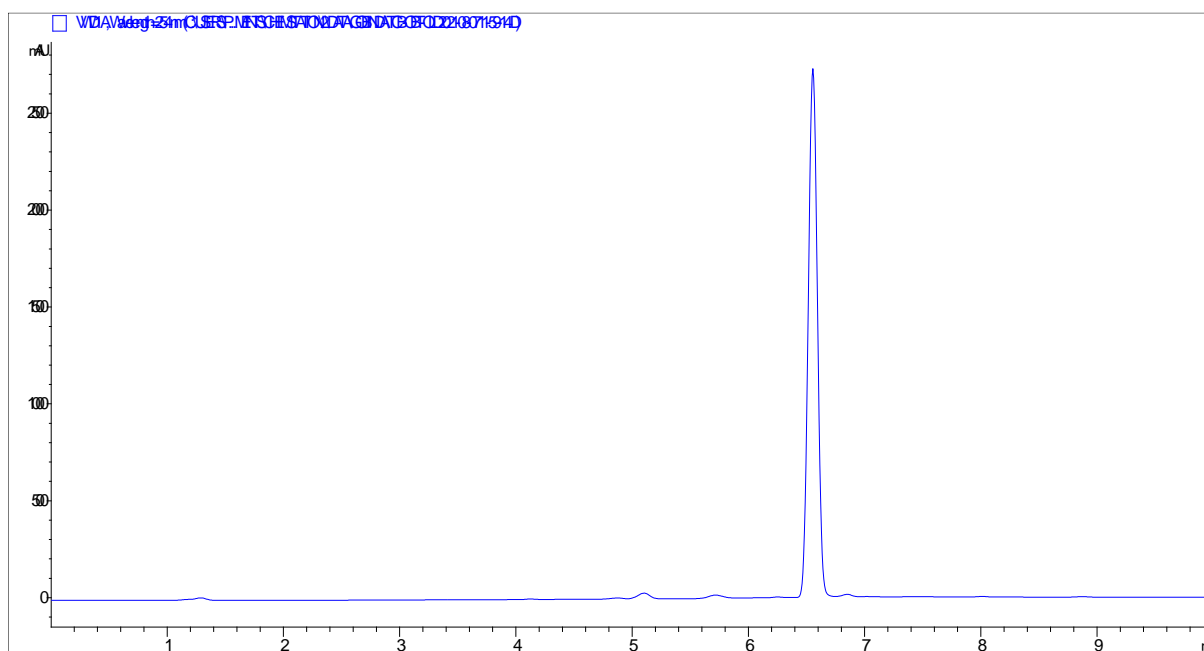

**Figure S8:** HPLC chromatogram of TCB-OBt, after 6 months of the synthesis. (retention time  $R_t = 6.555$  min)



### 3. NMR ( $^1\text{H}$ and $^{13}\text{C}$ ) and Mass spectra of side product:

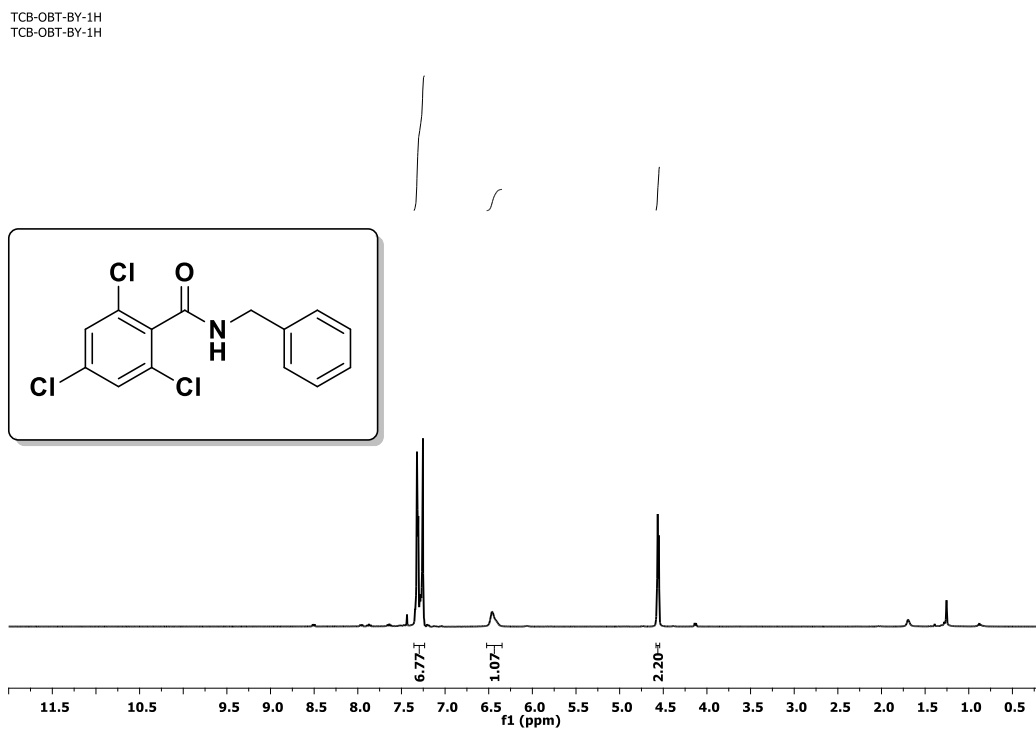

Figure S9:  $^1\text{H}$  NMR spectrum of side product

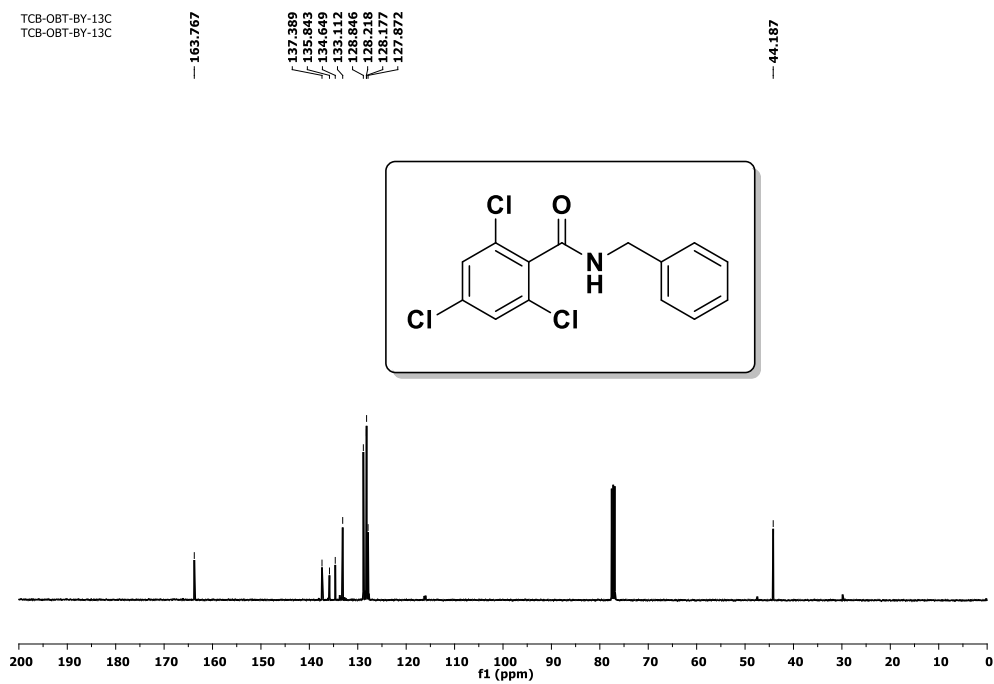

Figure S10:  $^{13}\text{C}$  NMR spectrum of side product

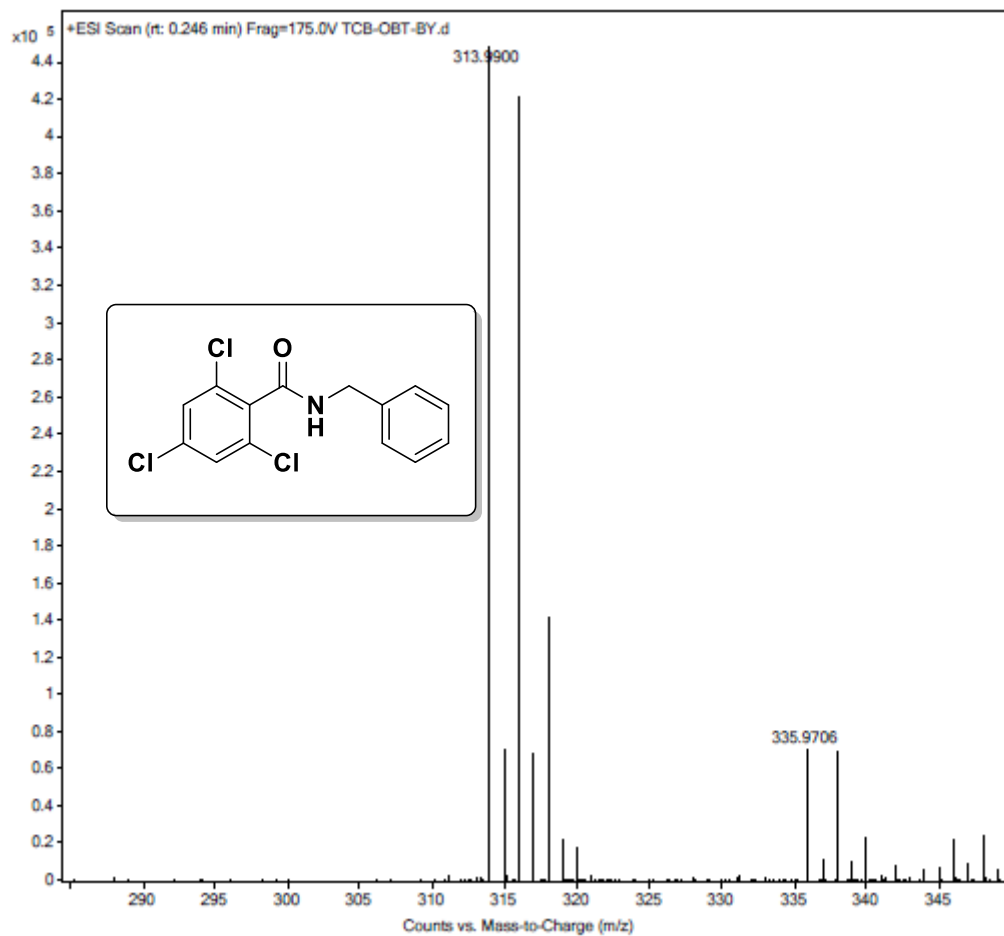

**Figure S11:** ESI-MASS spectrum of side product

#### 4. NMR ( $^1\text{H}$ and $^{13}\text{C}$ ) and Mass spectra of isolated intermediate:

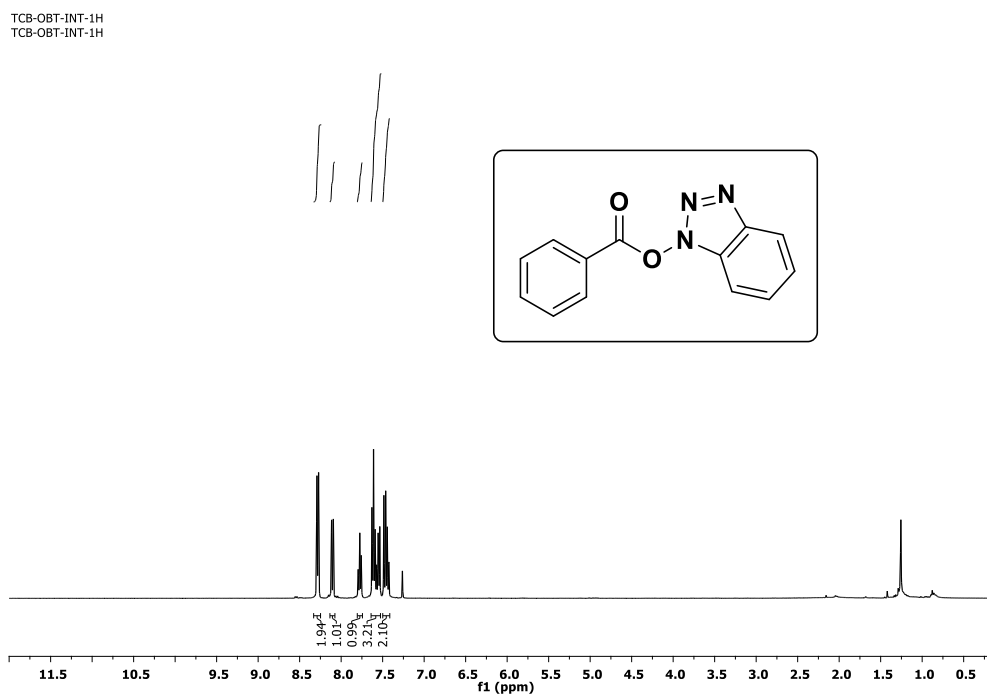

Figure S12:  $^1\text{H}$  NMR spectrum of isolated intermediate

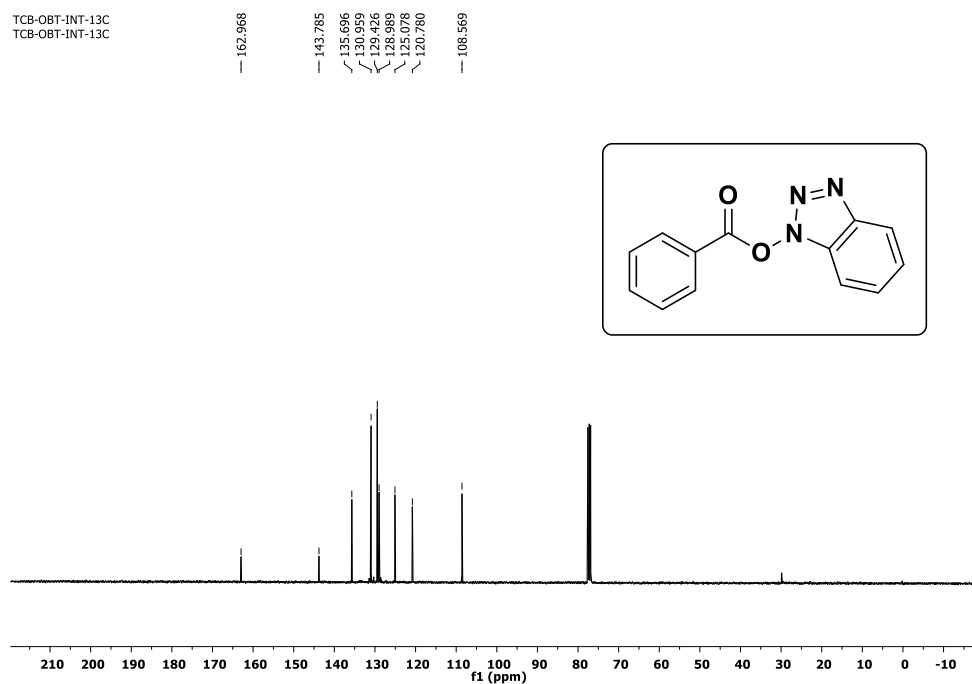

Figure S13:  $^{13}\text{C}$  NMR spectrum of isolated intermediate

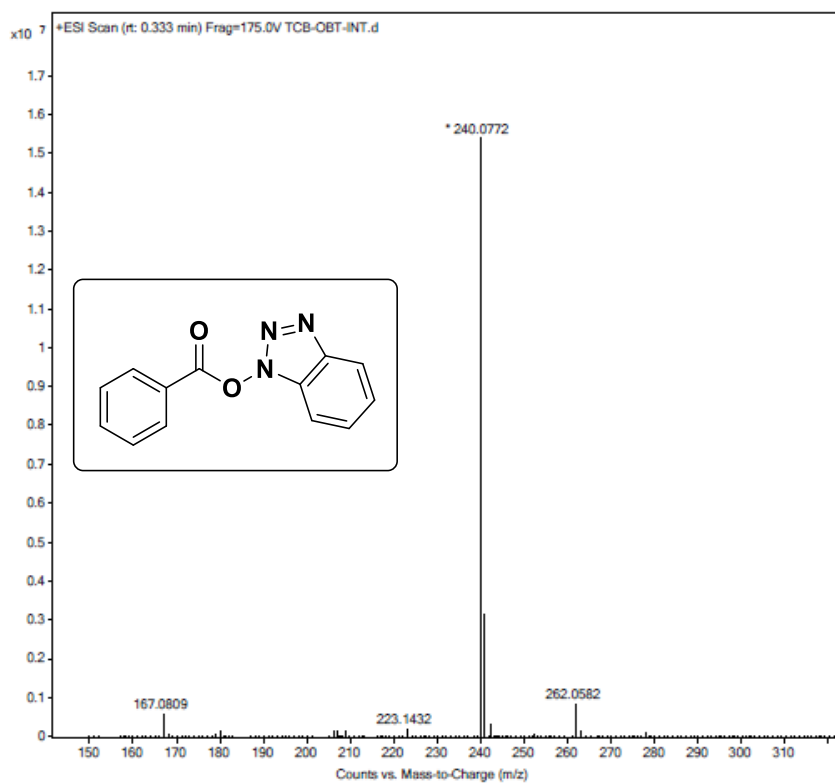

Figure S14: ESI-MASS spectrum of isolated intermediate

#### 4. NMR (<sup>1</sup>H and <sup>13</sup>C) and Mass spectra of amides:

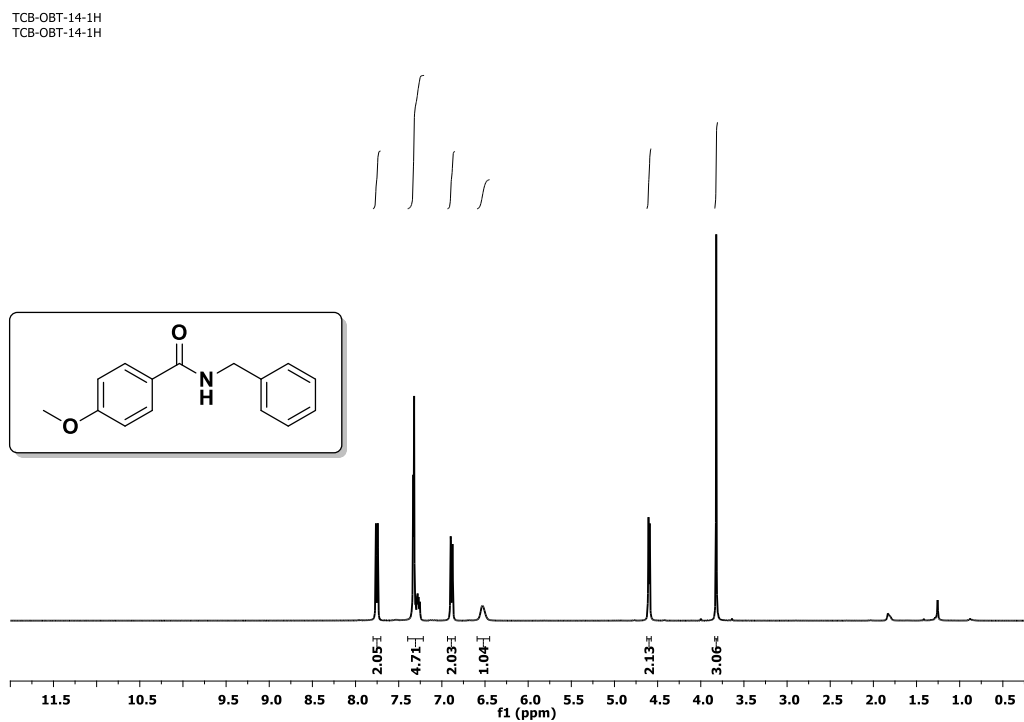

Figure S15: <sup>1</sup>H NMR spectrum of compound 2a

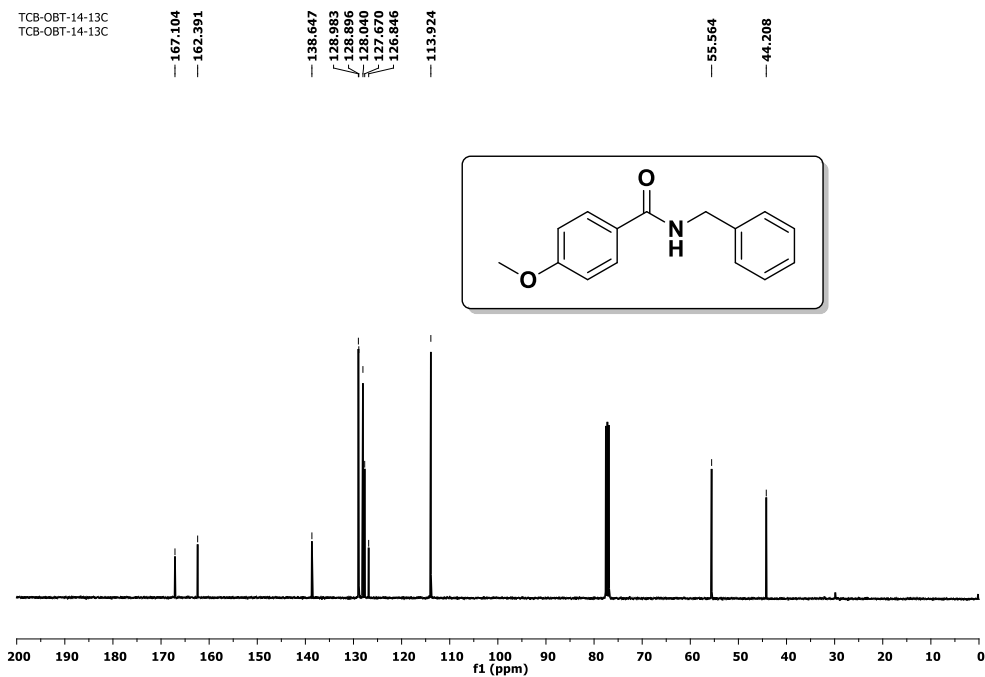

Figure S16:  $^{13}\text{C}$  NMR spectrum of compound 2a

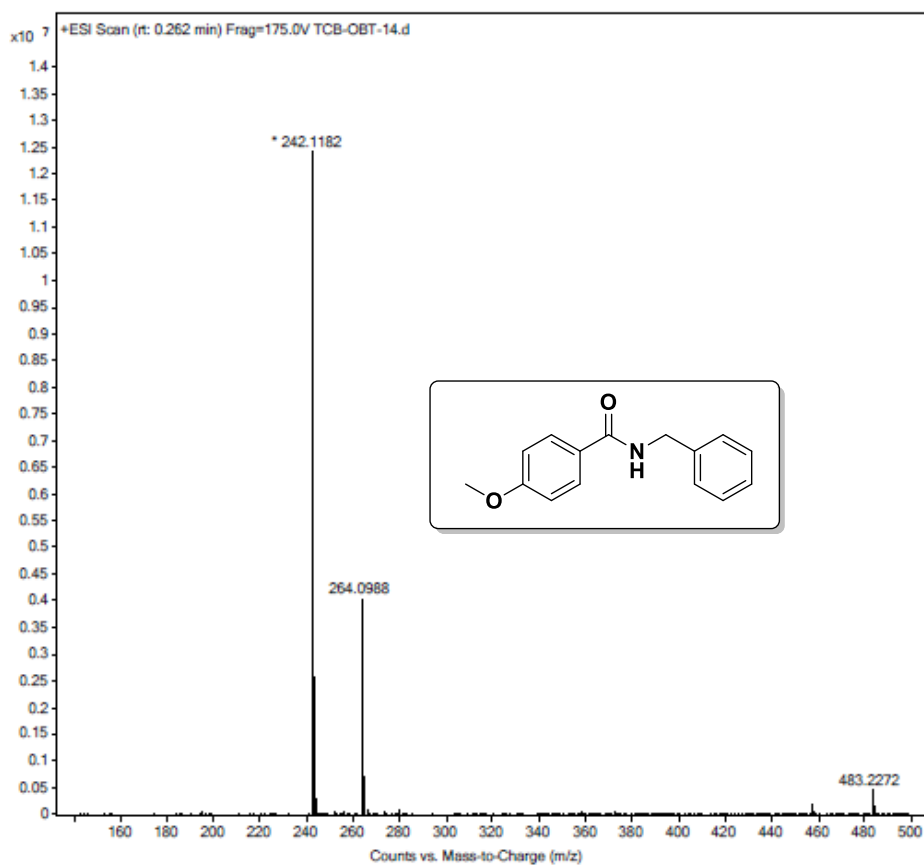

Figure S17: ESI-MASS spectrum of compound 2a

GD-TCB-OBT-3-1H  
1H

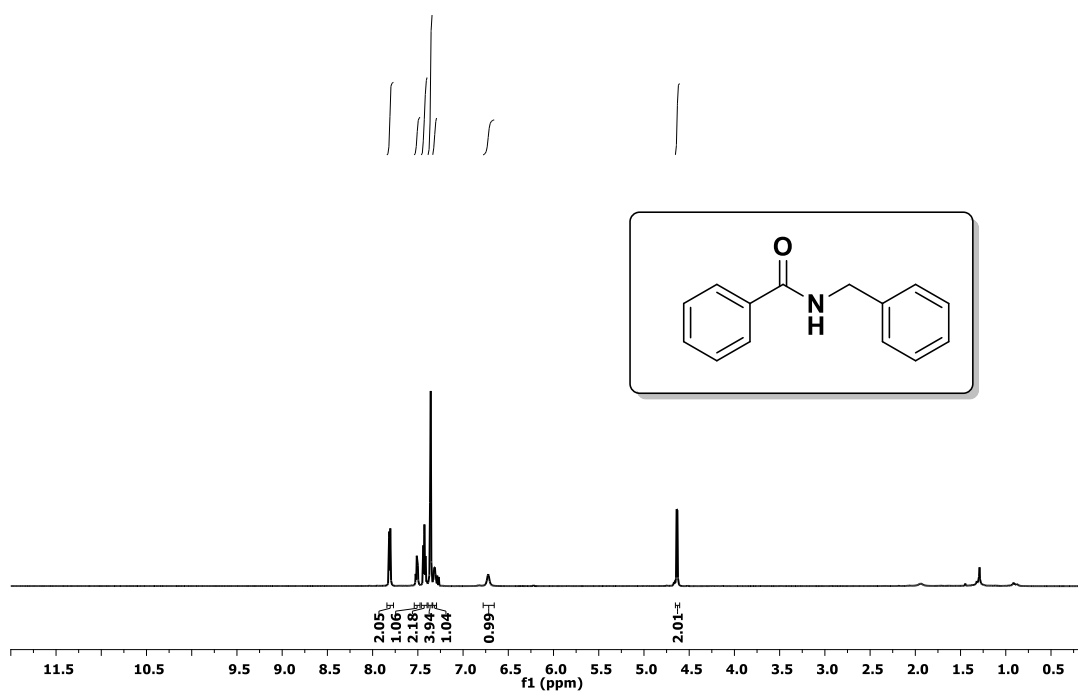

Figure S18: <sup>1</sup>H NMR spectrum of compound 2b

GD-TCB-OBT-3-13C  
13C

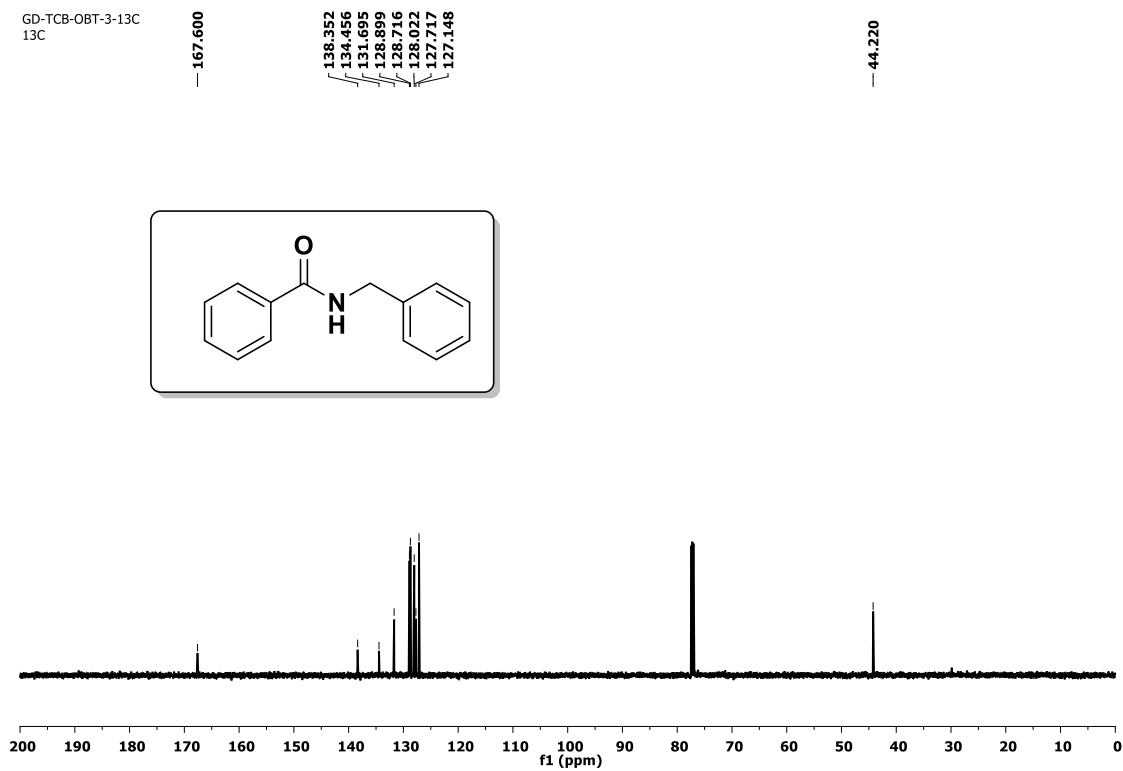

Figure S19: <sup>13</sup>C NMR spectrum of compound 2b

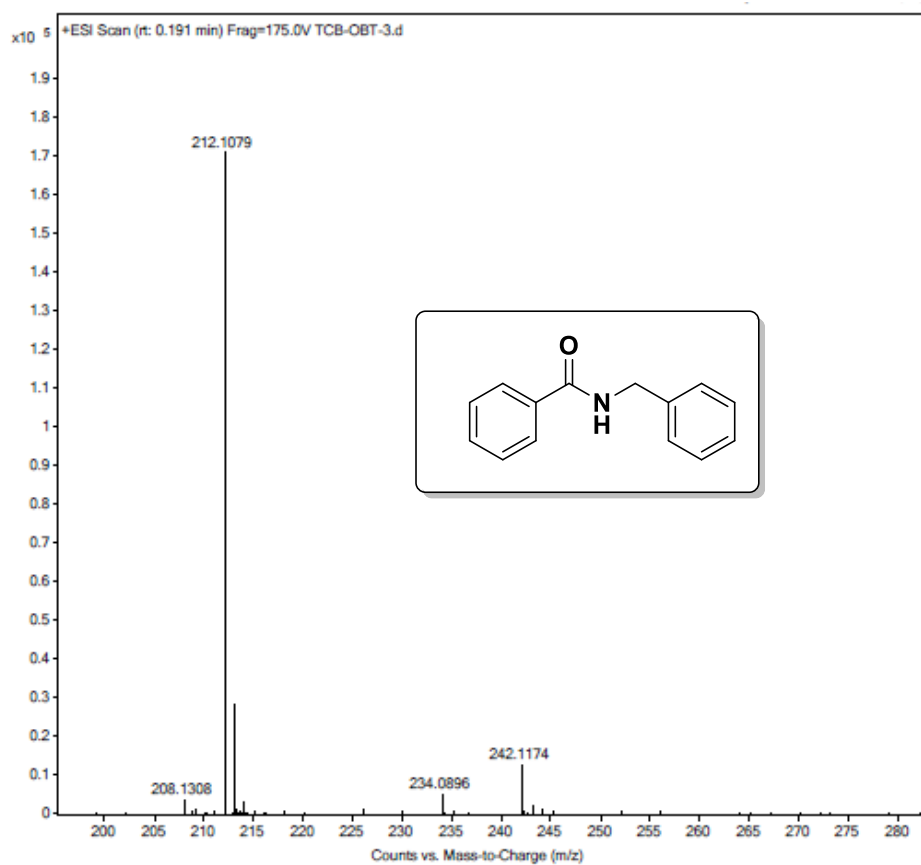

Figure S20: ESI-MASS spectrum of compound **2b**

TCB-OBT-11-1H  
TCB-OBT-11-1H

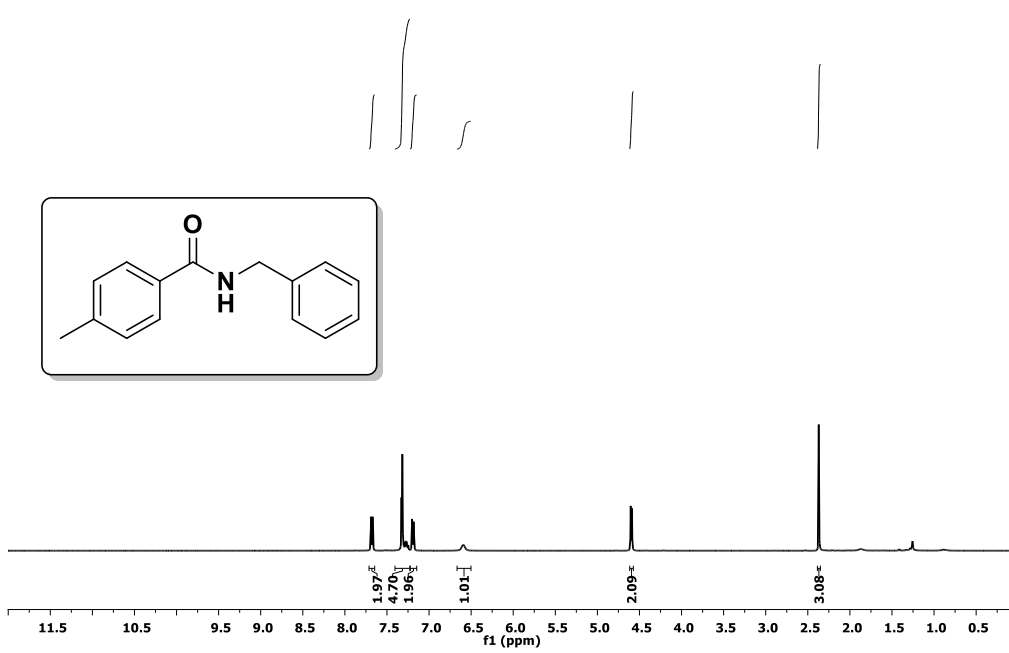

Figure S21: <sup>1</sup>H NMR spectrum of compound **2c**

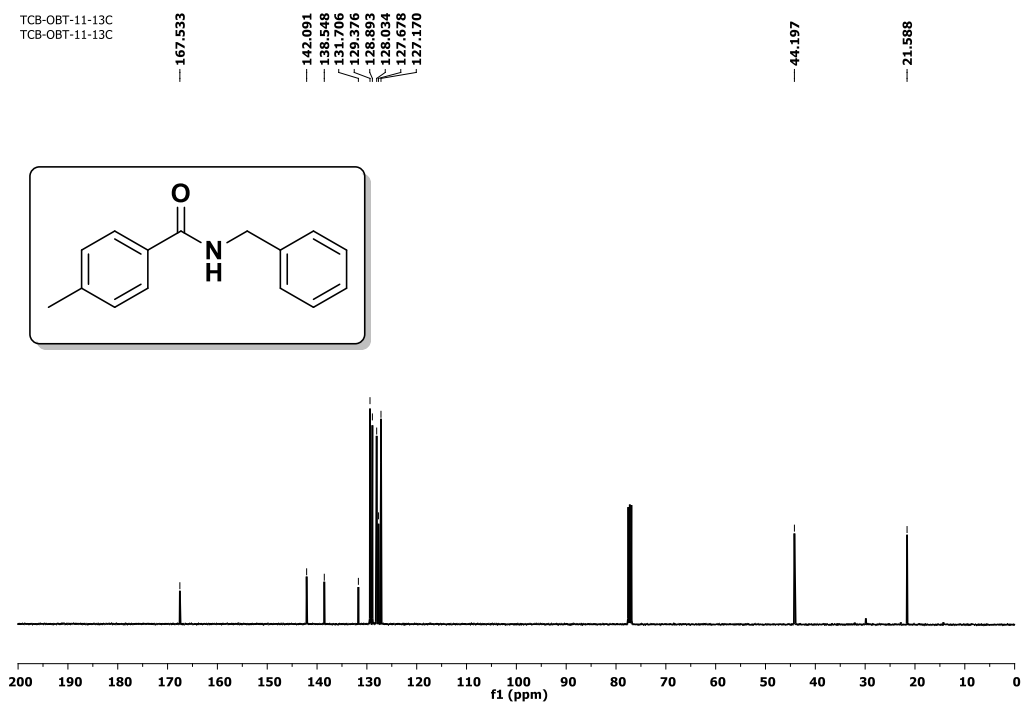

Figure S22:  $^{13}\text{C}$  NMR spectrum of compound **2c**

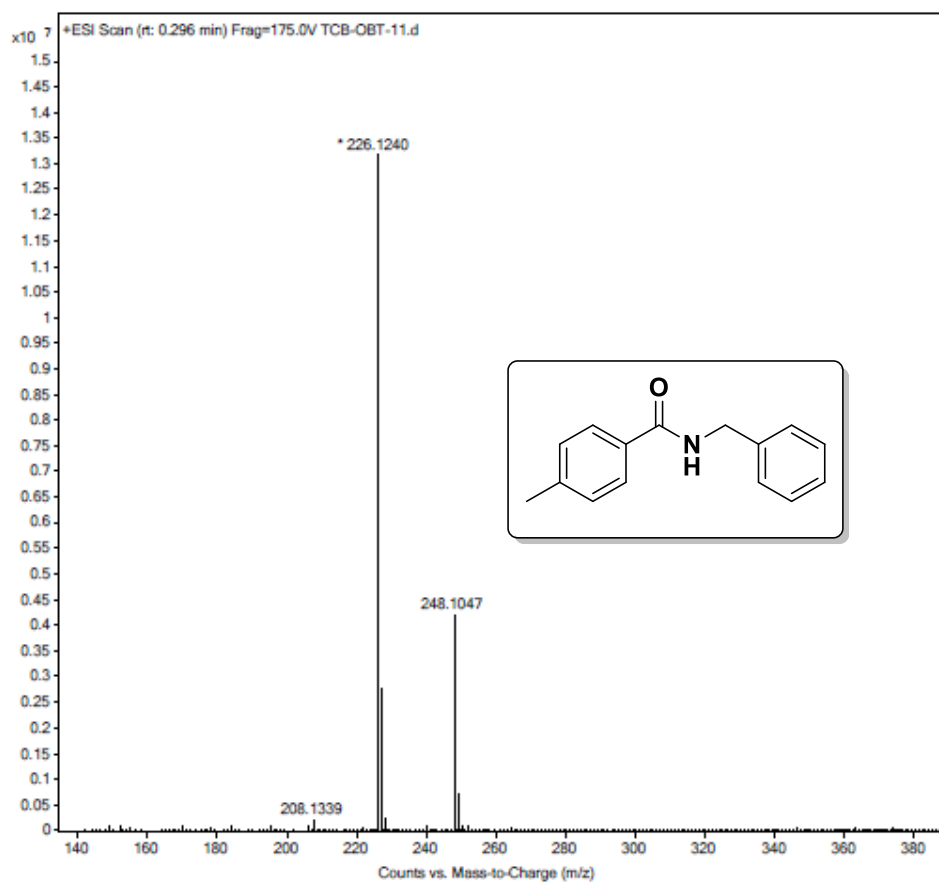

Figure S23: ESI-MASS spectrum of compound **2c**



TCB-OBT-15-H  
TCB-OBT-15-H

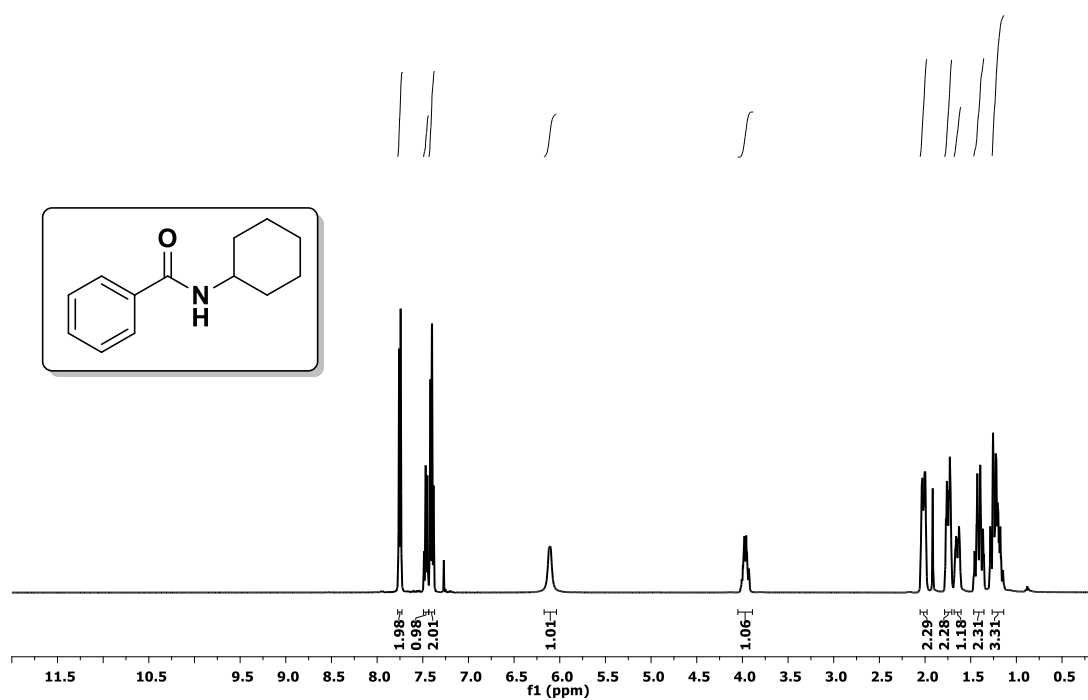

Figure S24: <sup>1</sup>H NMR spectrum of compound 2d

TCB-OBT-15-13C  
TCB-OBT-15-13C

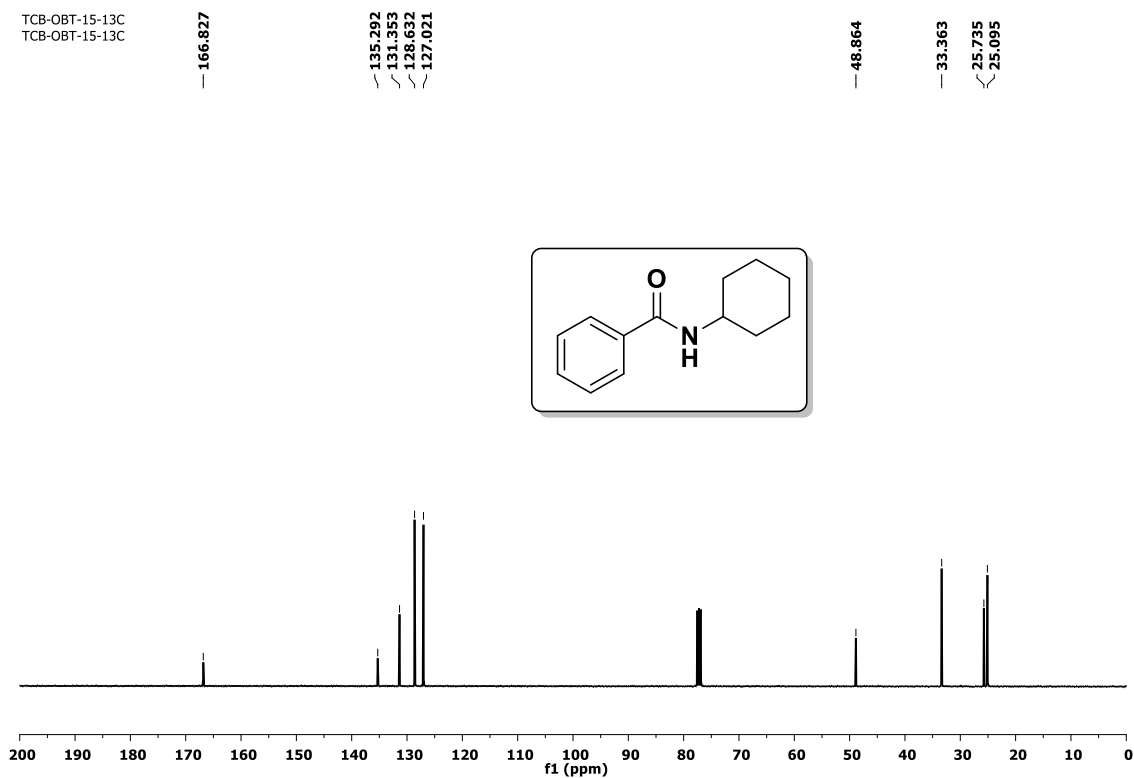

Figure S25: <sup>13</sup>C NMR spectrum of compound 2d

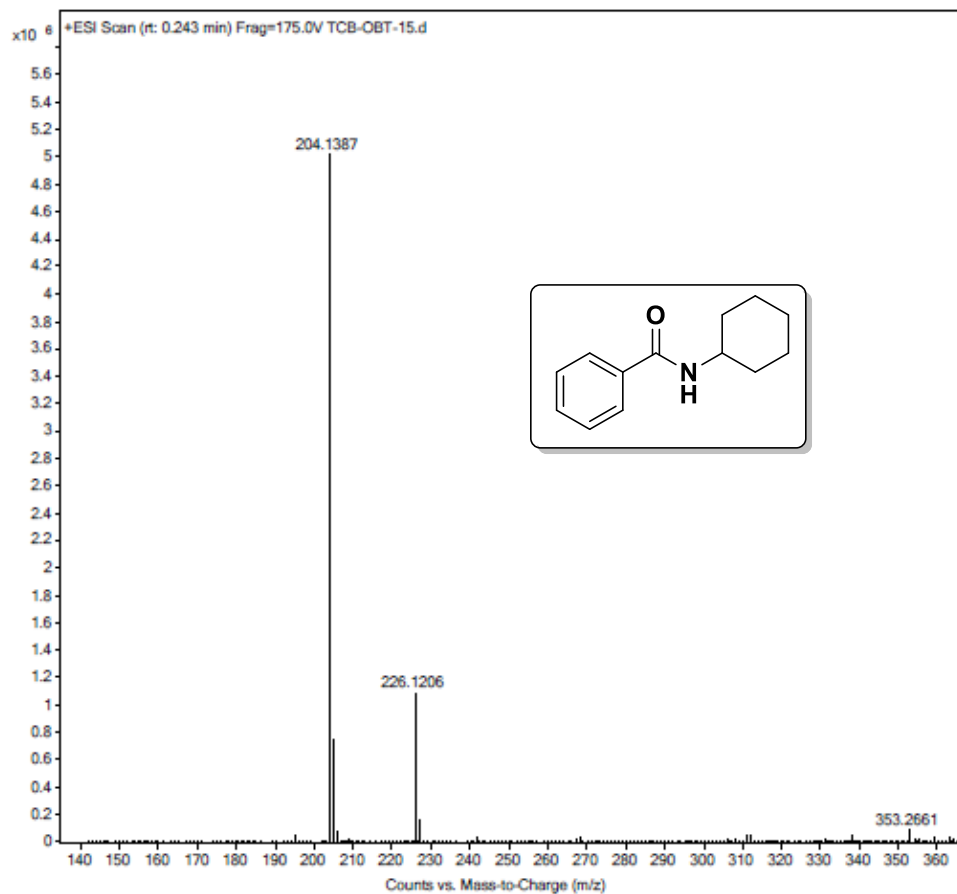

Figure S26: ESI-MASS spectrum of compound 2d

TCB-OBT-12-1H  
TCB-OBT-12-1H

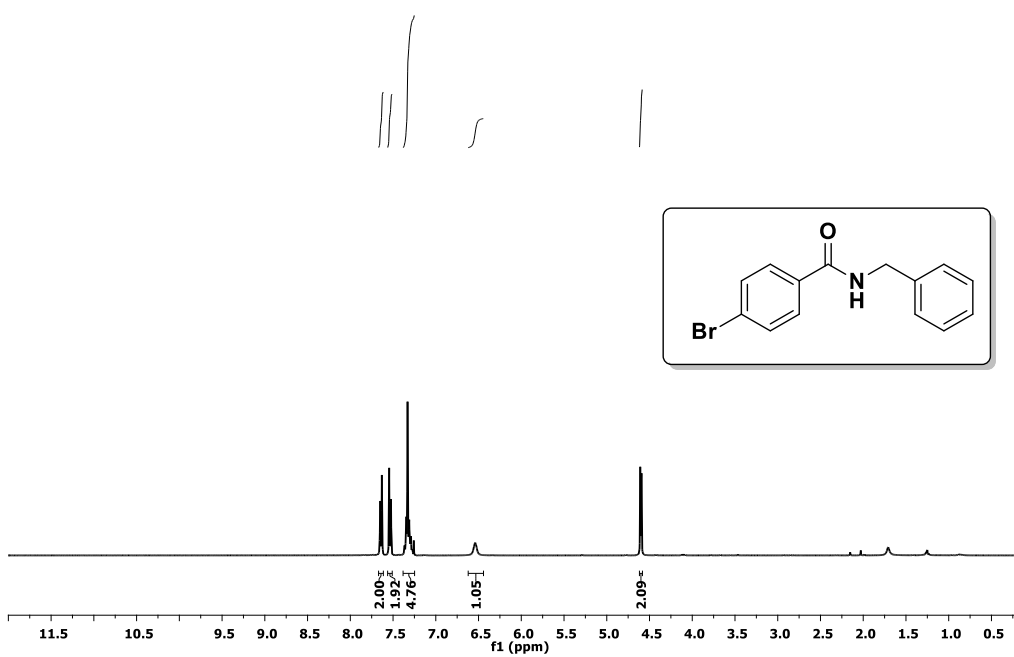

Figure S27: <sup>1</sup>H NMR spectrum of compound 2e

TCB-OBT-12-13C  
TCB-OBT-12-13C

— 166.630

138.130  
133.394  
132.005  
129.026  
128.810  
128.114  
127.970  
126.432

— 44.418

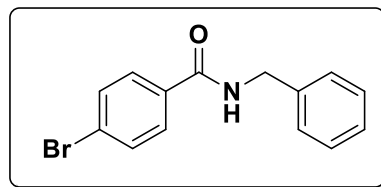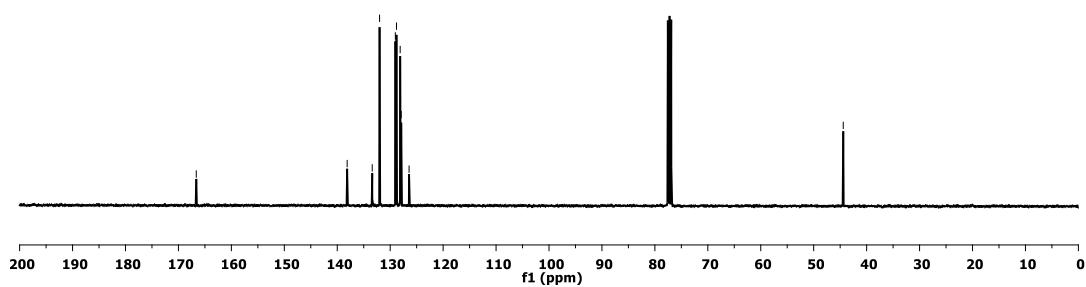

Figure S28:  $^{13}\text{C}$  NMR spectrum of compound 2e

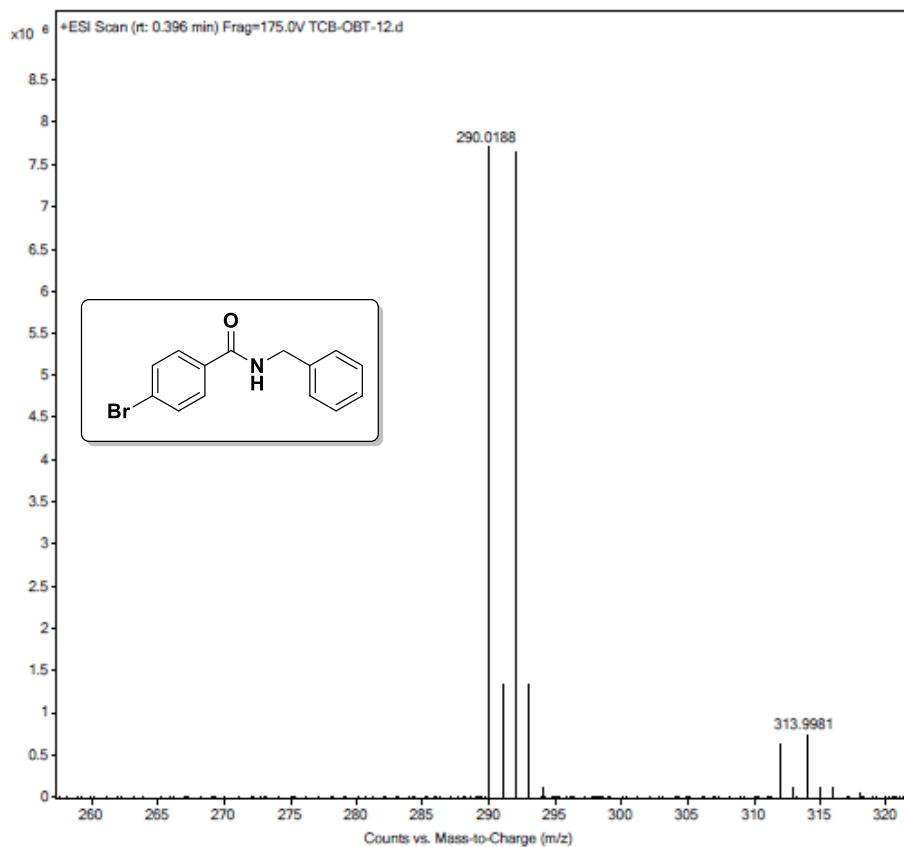

Figure S29: ESI-MASS spectrum of compound 2e

TCB-OBT-16-1H  
TCB-OBT-16-1H

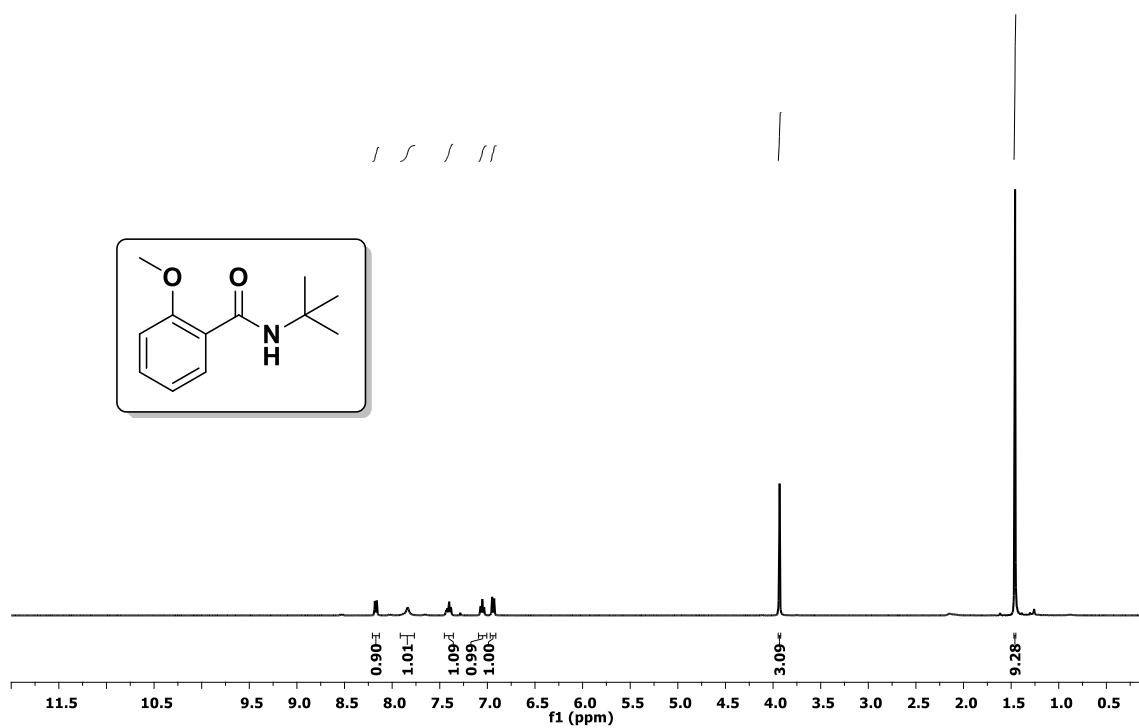

Figure S30: <sup>1</sup>H NMR spectrum of compound 2f

TCB-OBT-16-13C  
TCB-OBT-16-13C

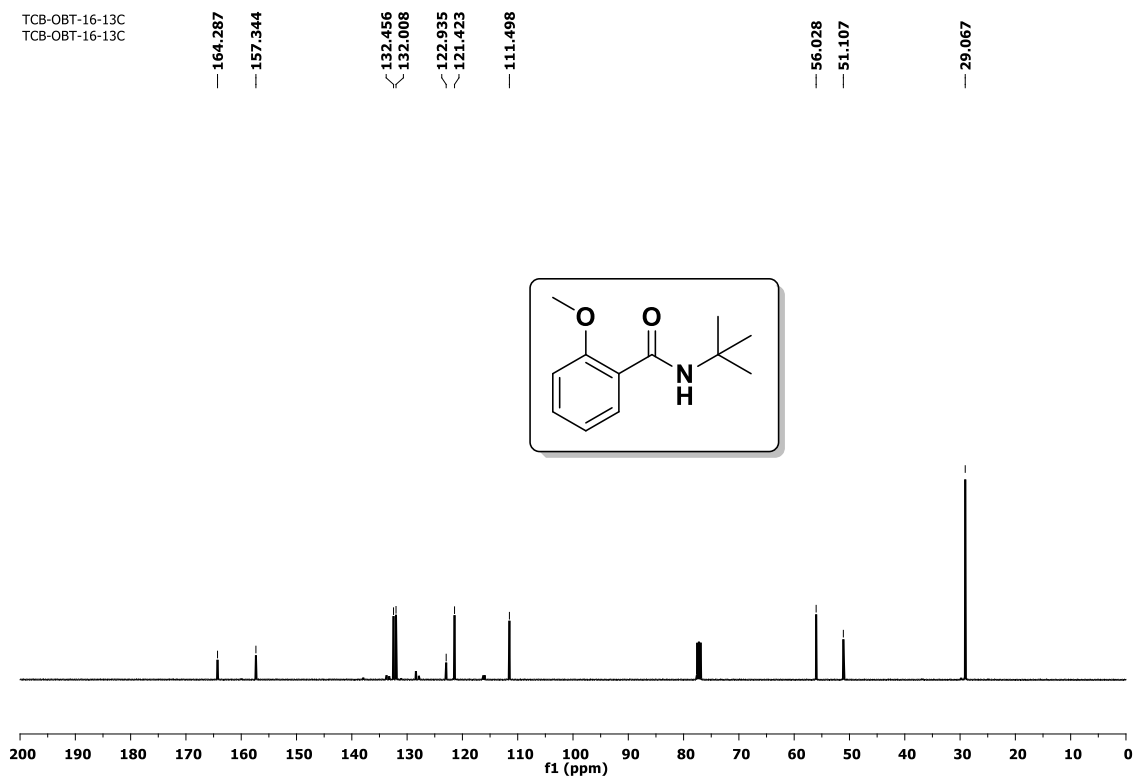

Figure S31: <sup>13</sup>C NMR spectrum of compound 2f

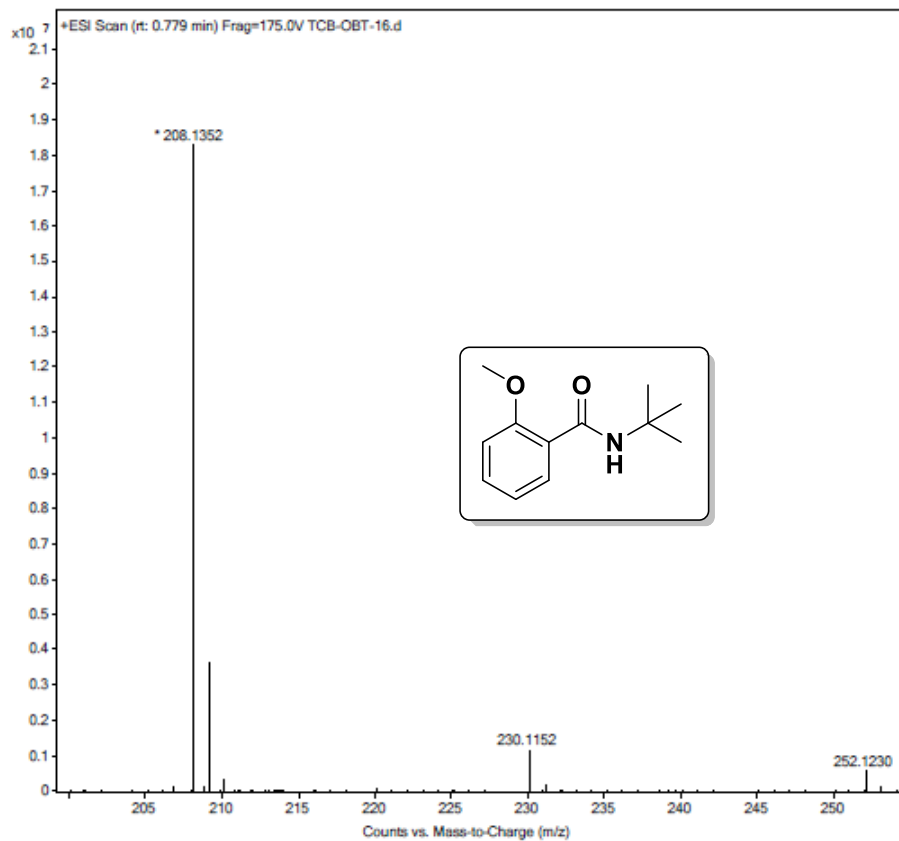

Figure S32: ESI-MASS spectrum of compound 2f

TCB-OBT-17-1H  
TCB-OBT-17-1H

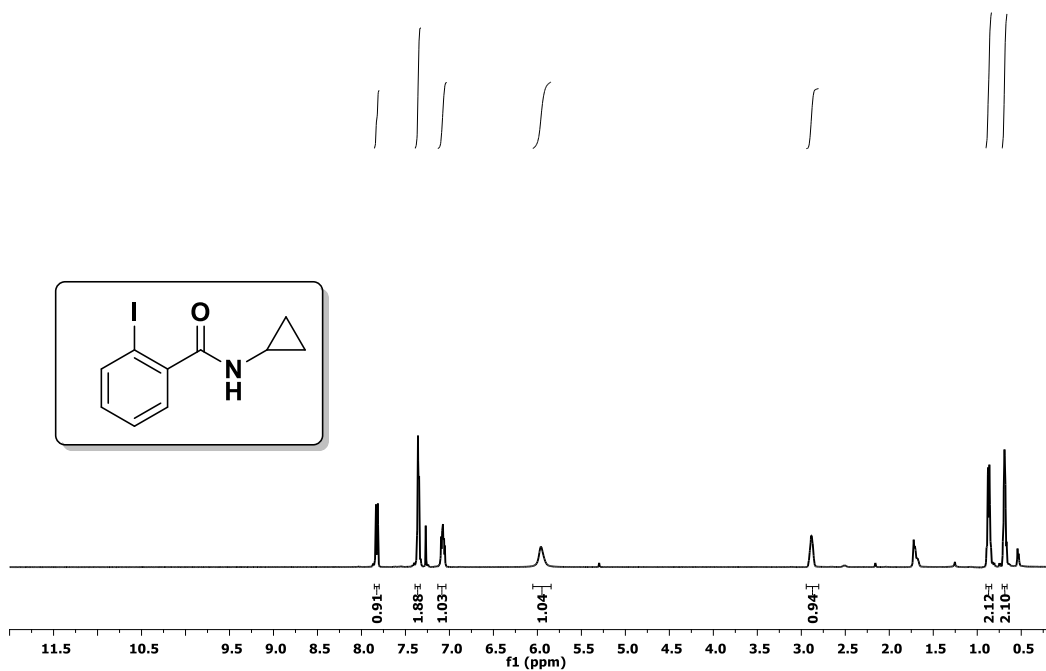

Figure S33: <sup>1</sup>H NMR spectrum of compound 2g

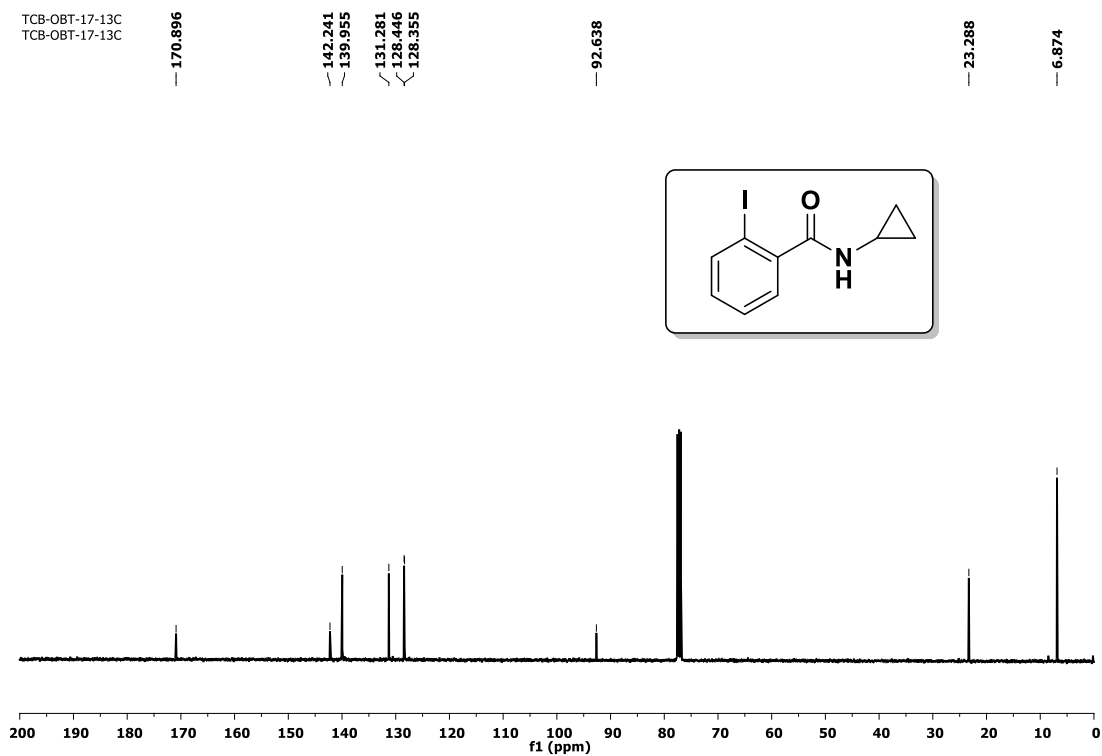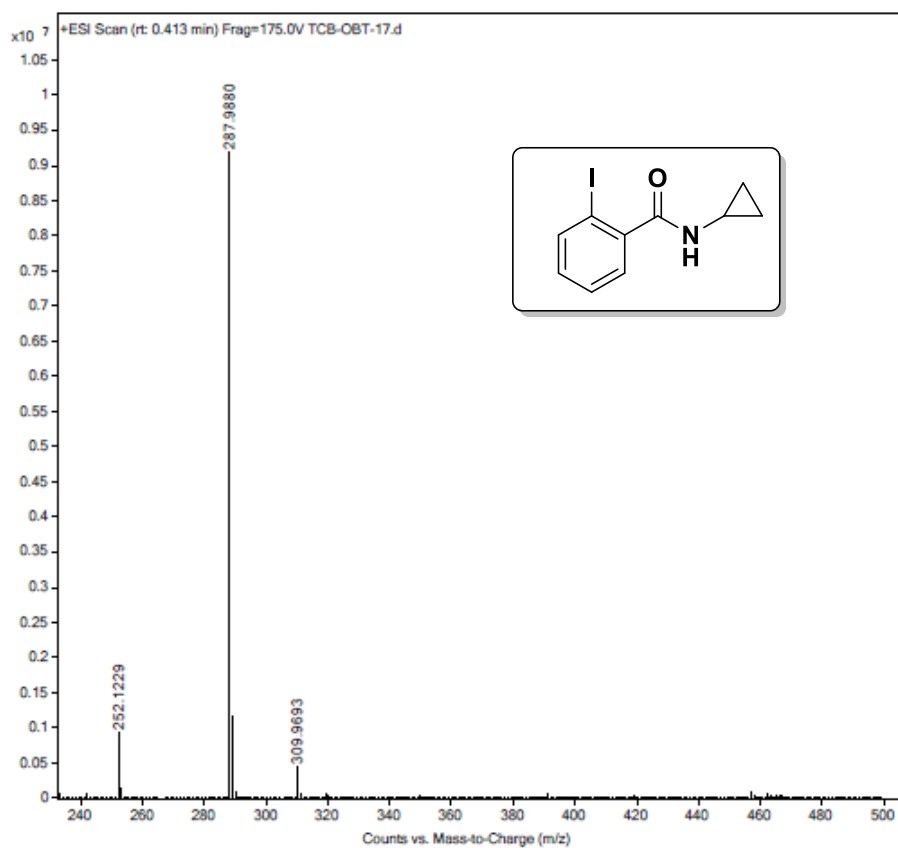

TCB-OBT-13-1H  
TCB-OBT-13-1H

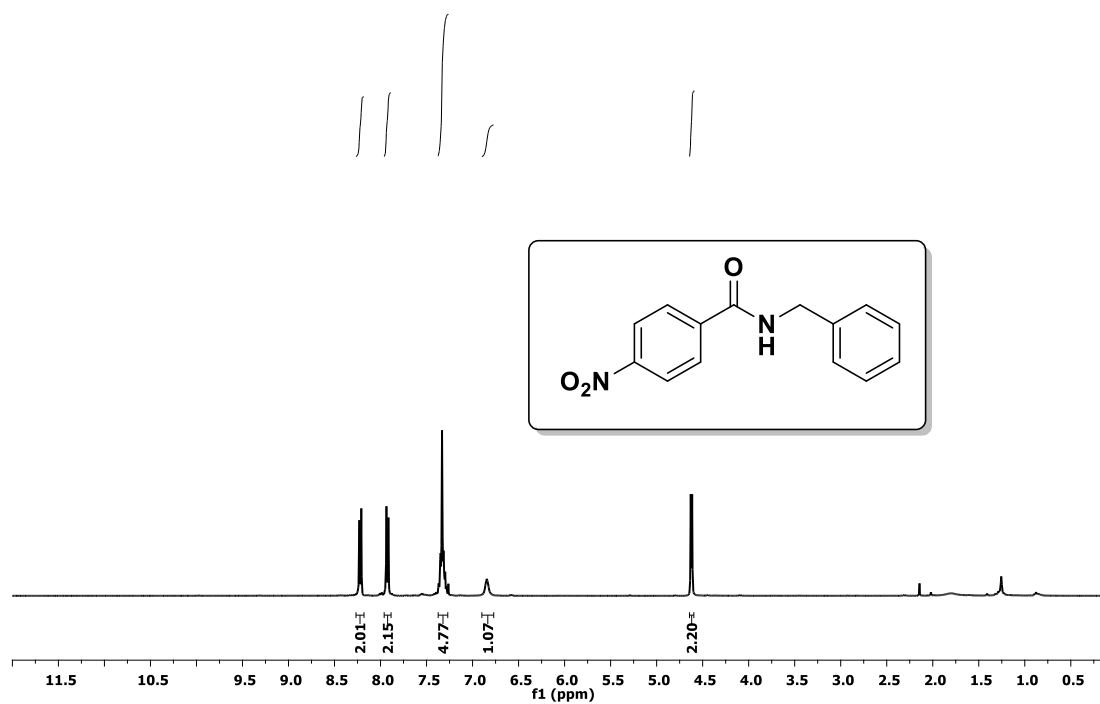

Figure S36: <sup>1</sup>H NMR spectrum of compound 2h

TCB-OBT-13-13C  
TCB-OBT-13-13C

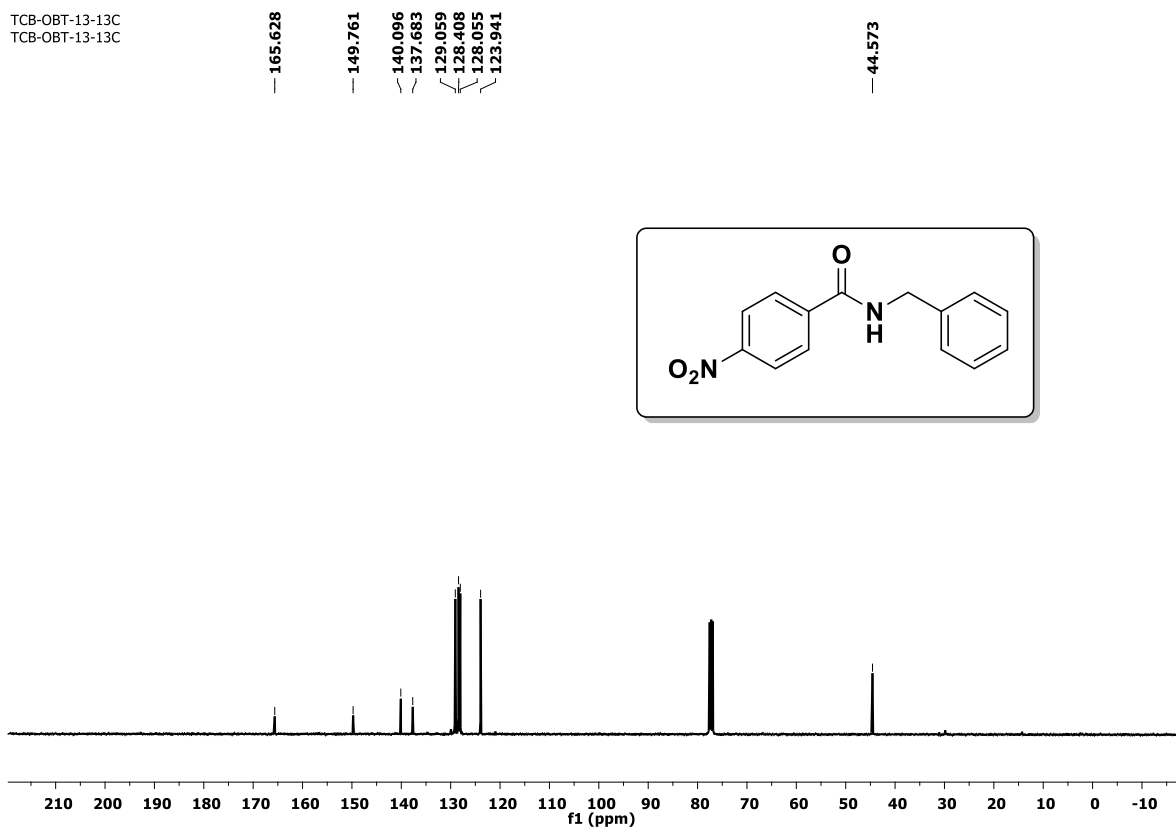

Figure S37: <sup>13</sup>C NMR spectrum of compound 2h

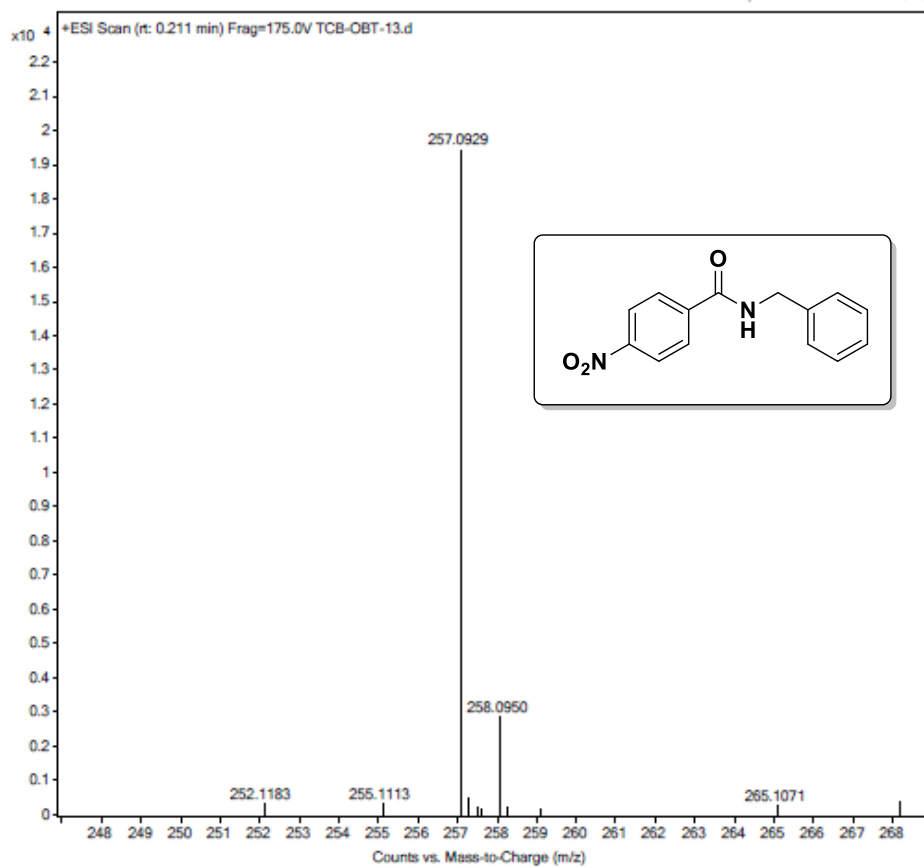

Figure S38: ESI-MASS spectrum of compound 2h

TCB-OBT-26-1H.1.fid  
TCB-OBT-26-1H

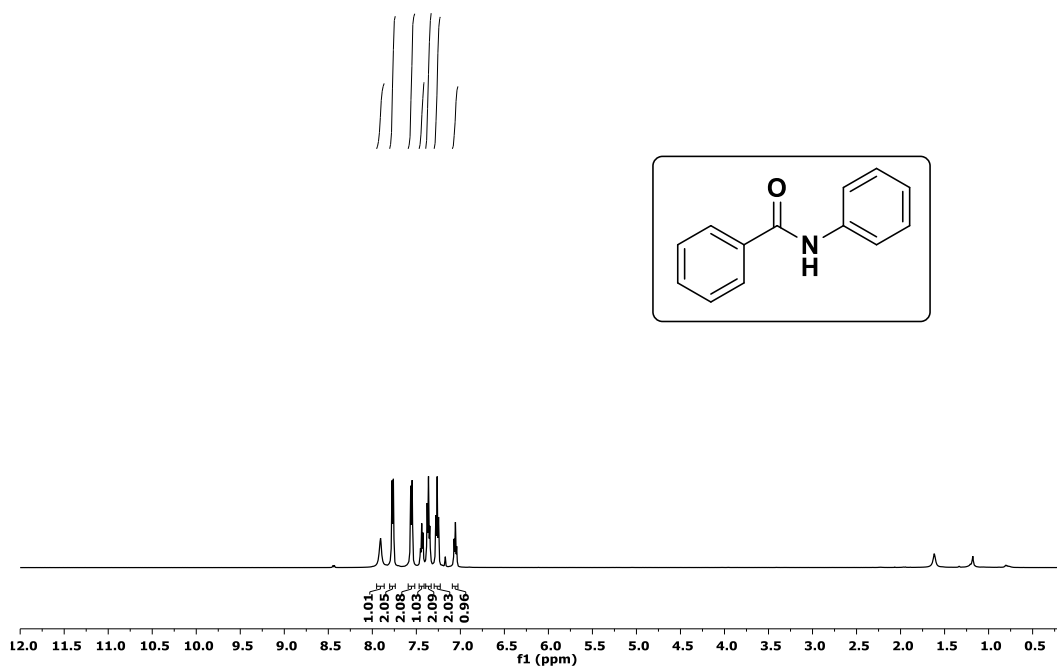

Figure S39: <sup>1</sup>H NMR spectrum of compound 2i



TCB-OBT-26-13C.3.fid  
TCB-OBT-26-13C

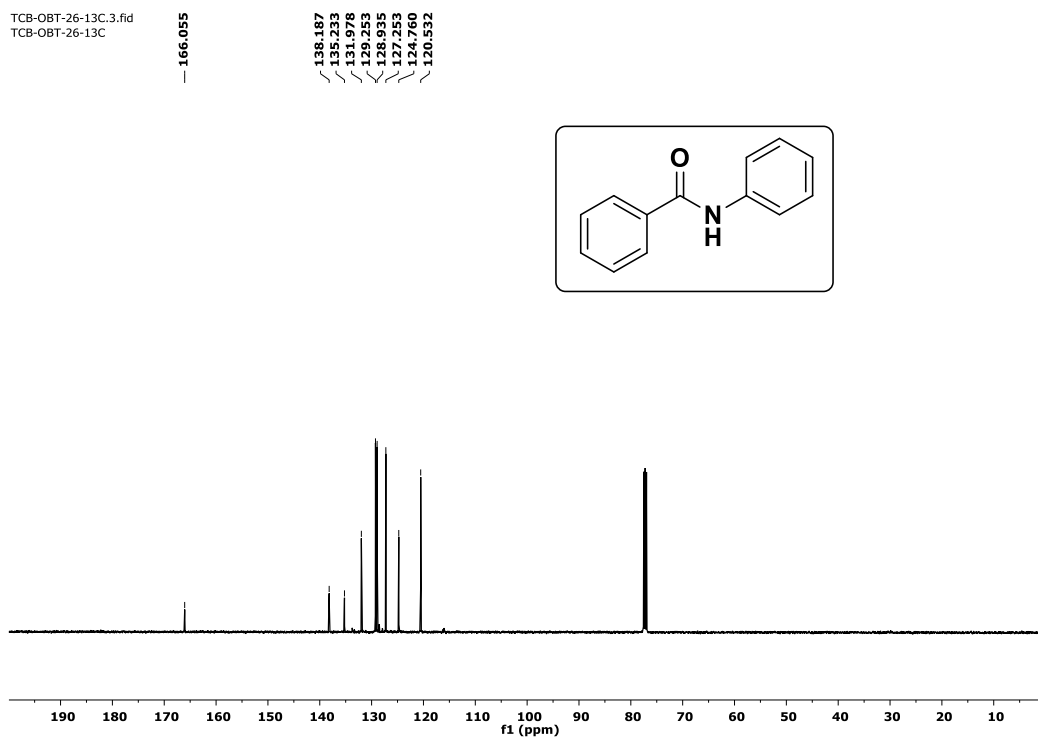

Figure S40:  $^{13}\text{C}$  NMR spectrum of compound **2i**

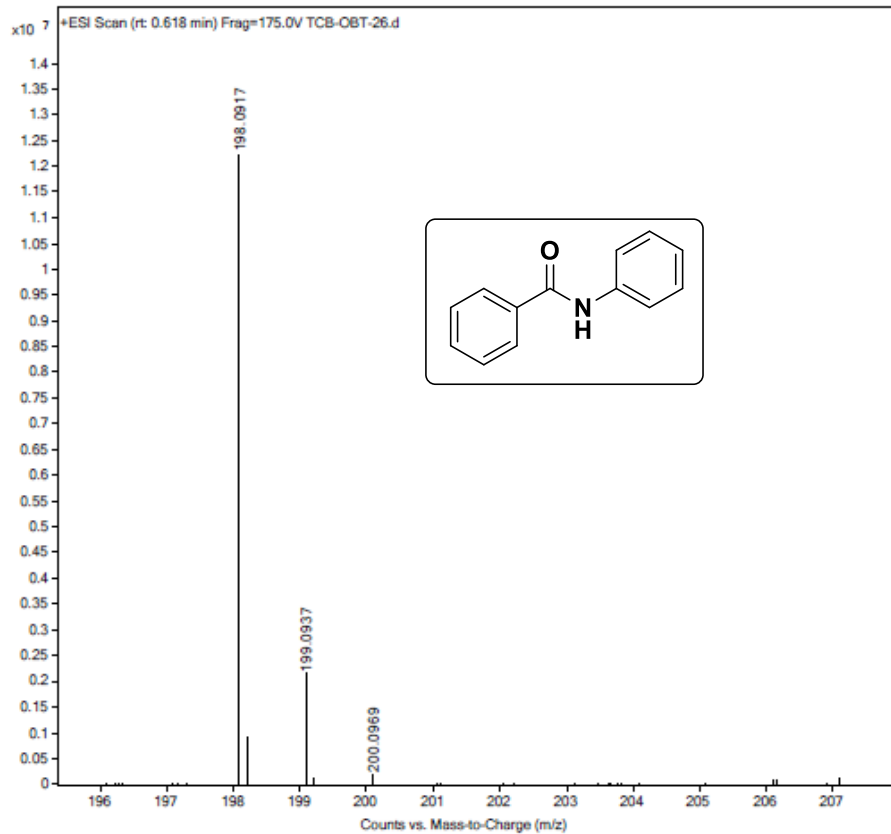

Figure S41: ESI-MASS spectrum of compound **2i**

TCB-OBT-29-1H.4.fid  
1H

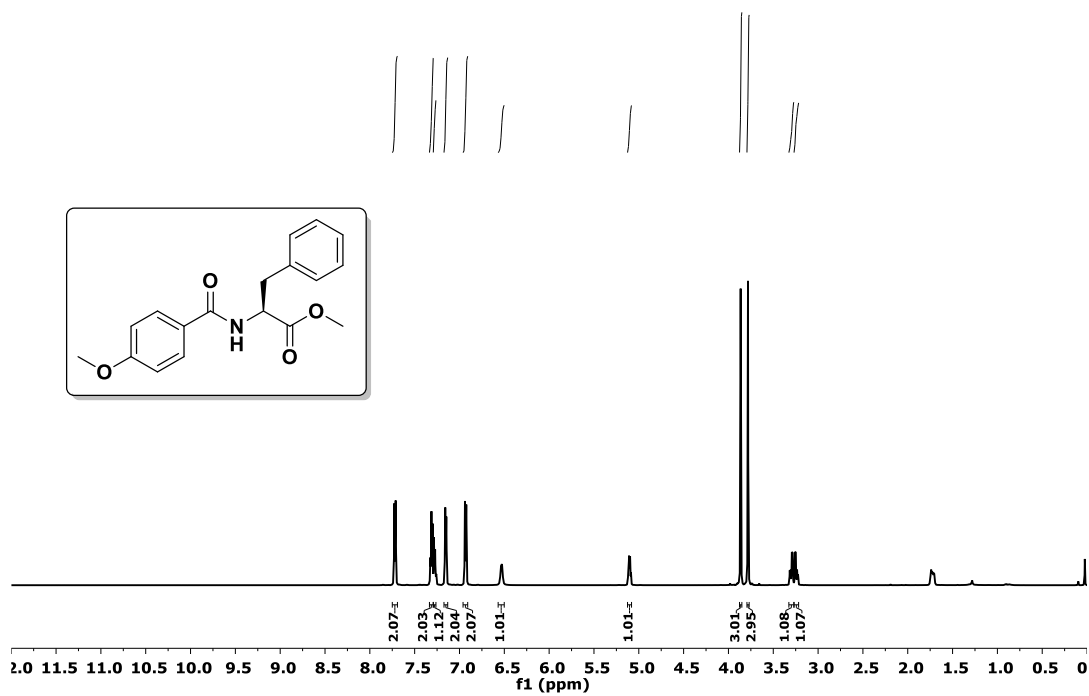

Figure S42:  $^1\text{H}$  NMR spectrum of compound 2j

TCB-OBT-29-1H.5.fid  
13C

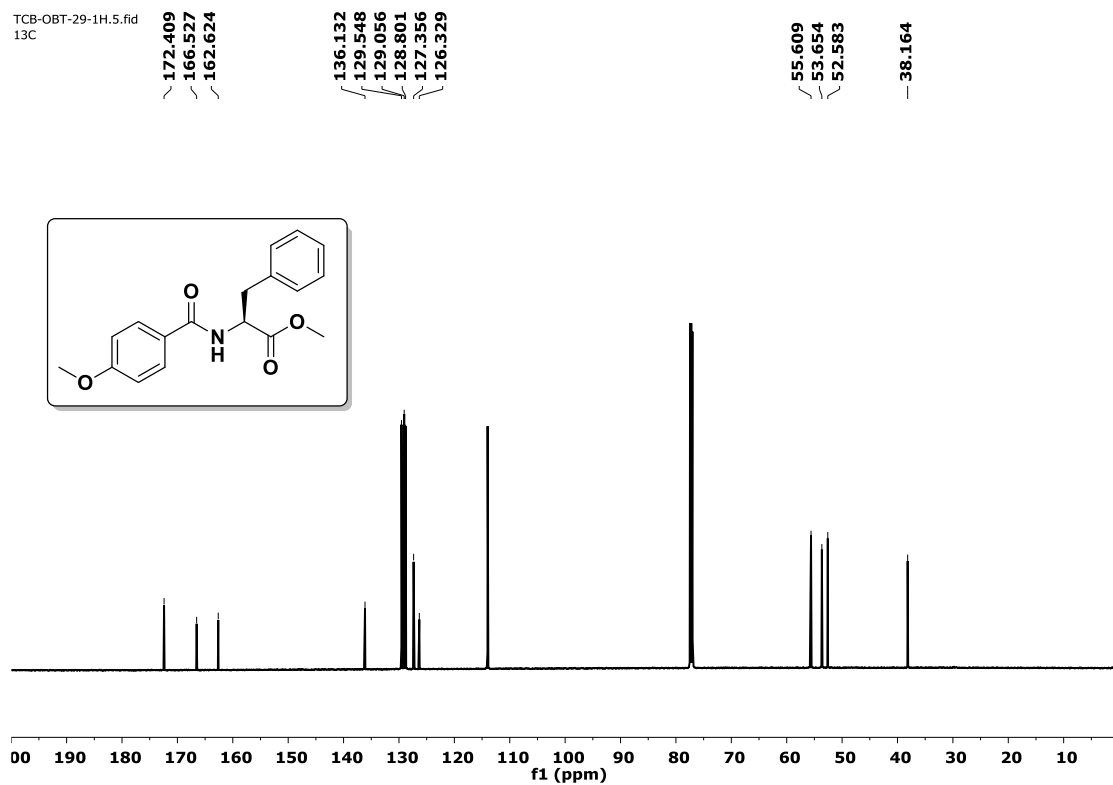

Figure S43:  $^{13}\text{C}$  NMR spectrum of compound 2j

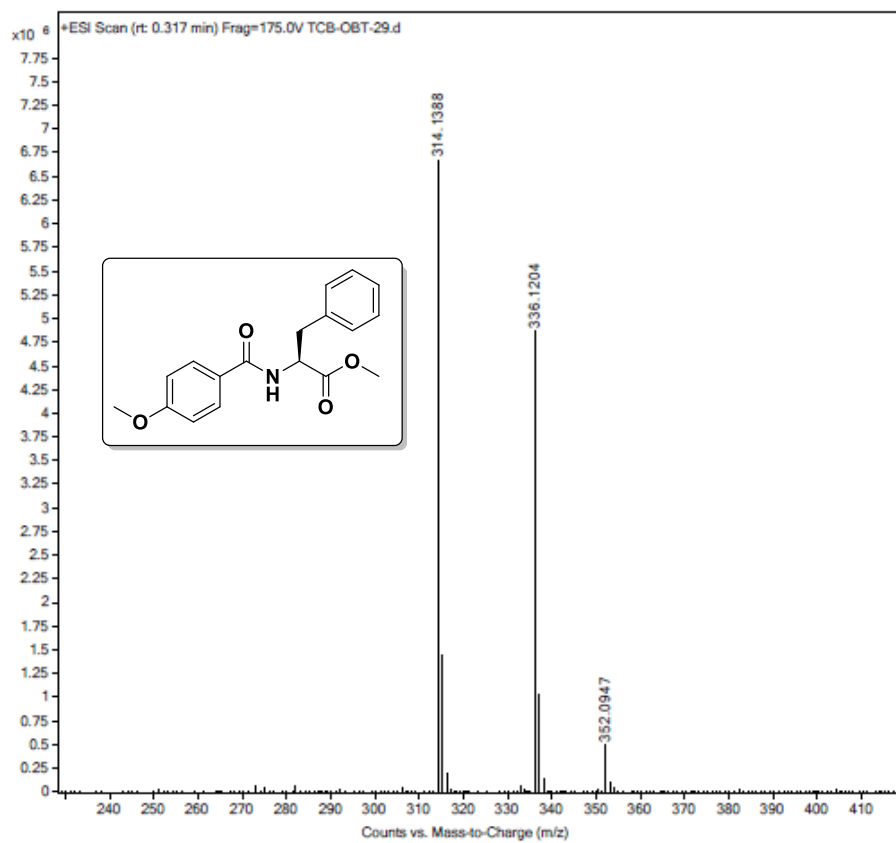

Figure S44: ESI-MASS spectrum of compound 2j

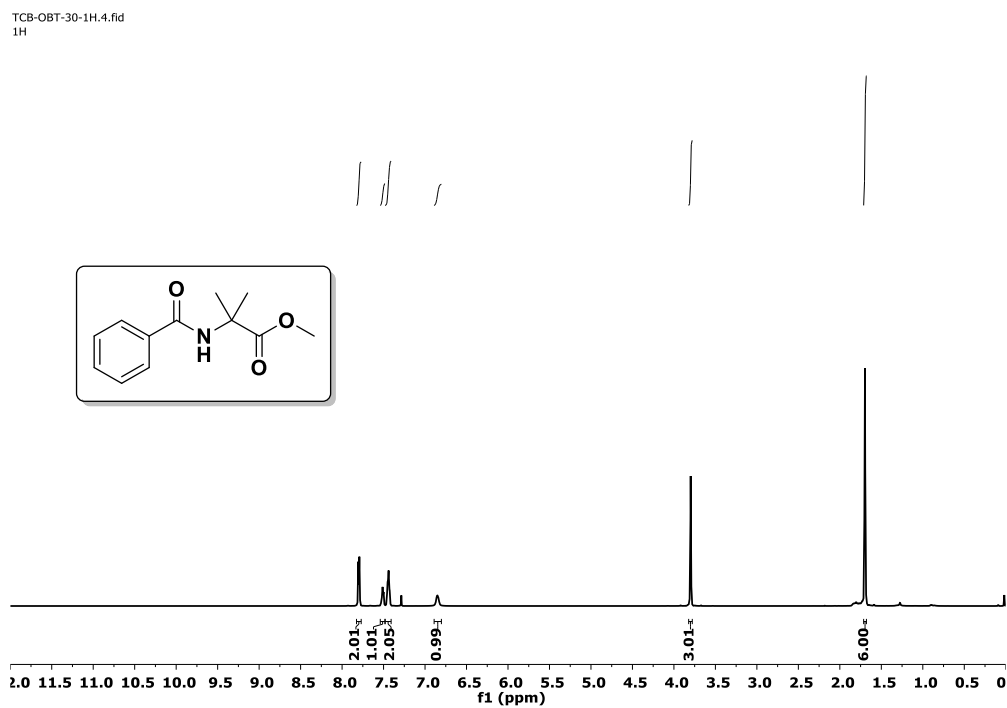

Figure S45: <sup>1</sup>H NMR spectrum of compound 2k

TCB-OBT-30-13C.6.f1  
13C

— 175.490

— 166.806

✓ 134.665

✓ 131.751

✓ 128.722

✓ 127.140

— 57.077

— 52.965

— 24.947

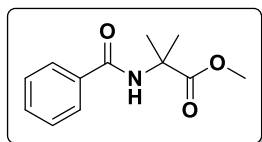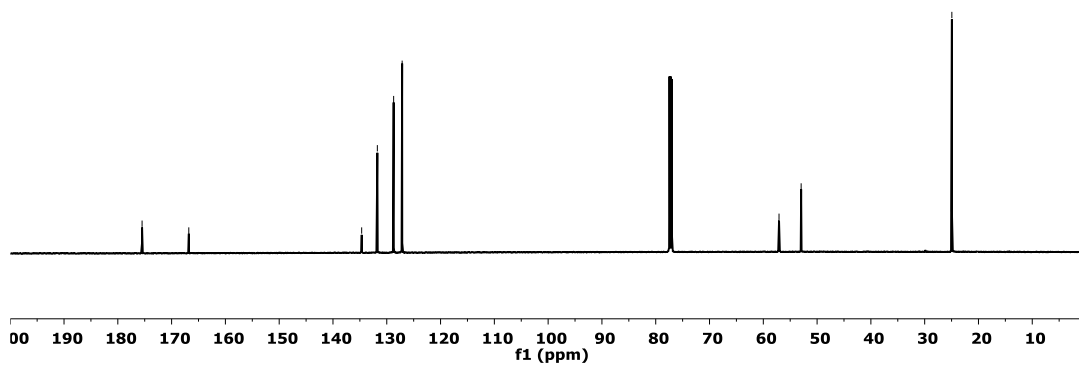

Figure S46:  $^{13}\text{C}$  NMR spectrum of compound **2k**

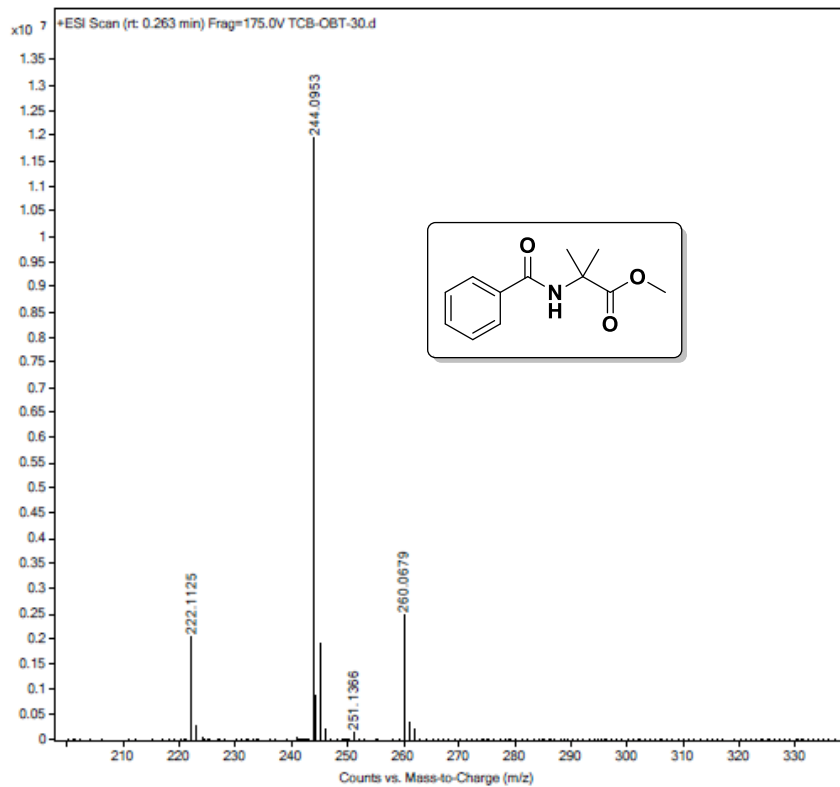

Figure S47: ESI-MASS spectrum of compound **2k**

TCB-OBT-31-1H.4.fid  
1H

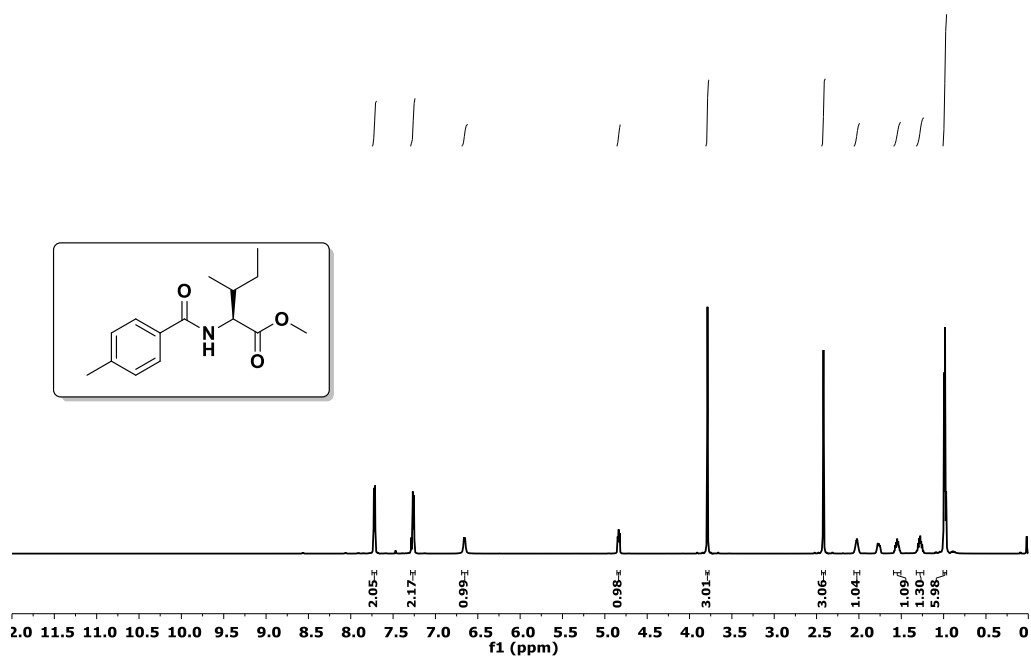

Figure S48: <sup>1</sup>H NMR spectrum of compound 21

TCB-OBT-31-13C.6.fid  
13C

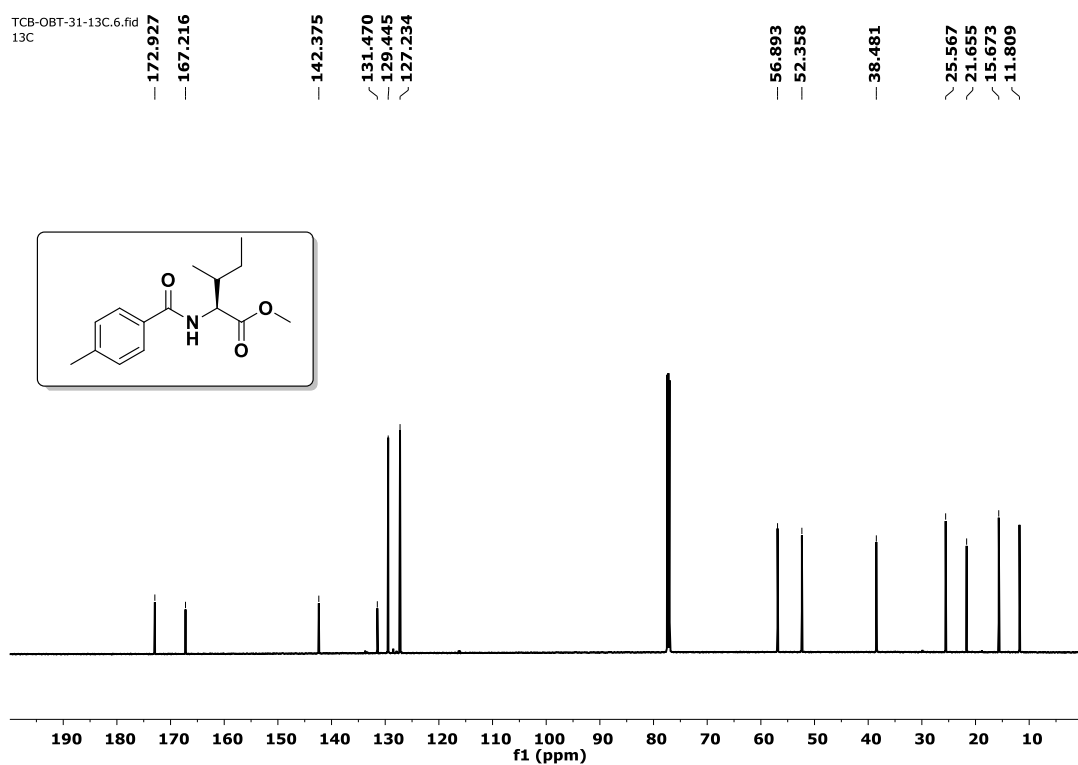

Figure S49: <sup>13</sup>C NMR spectrum of compound 21

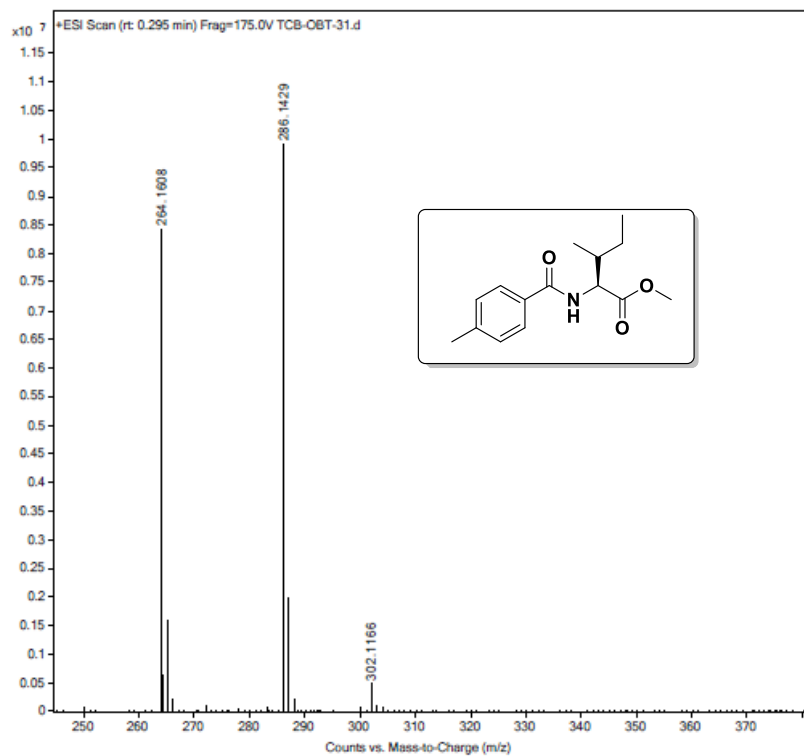

Figure S50: ESI-MASS spectrum of compound 2l

TCB-OBT-32-1H.1.fid  
1H

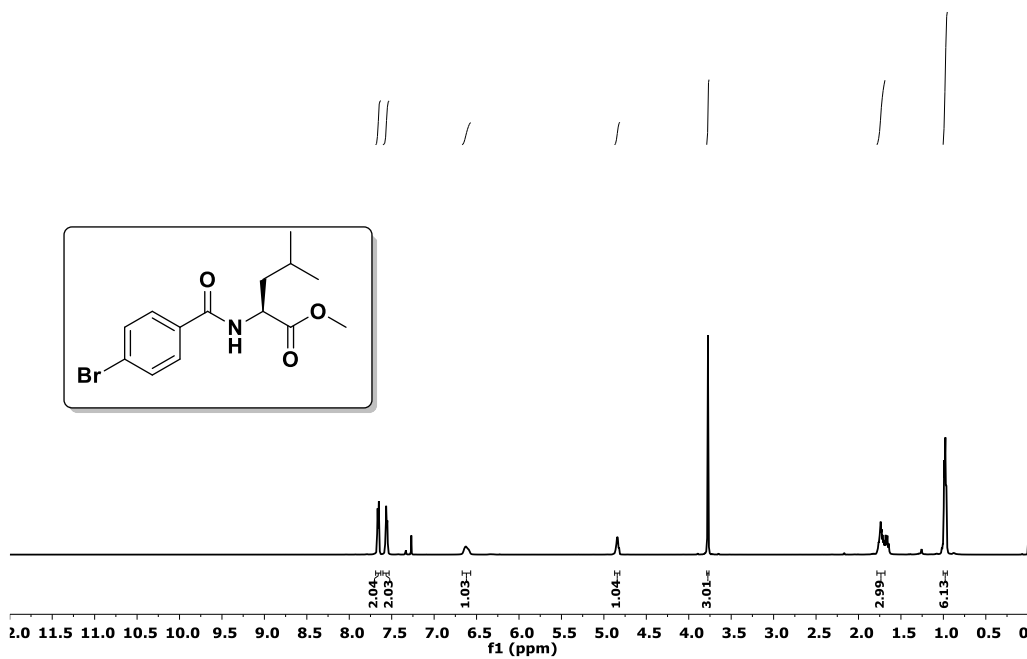

Figure S51:  $^1\text{H}$  NMR spectrum of compound 2m

TCB-OBT-32-13C.3.fid  
13C

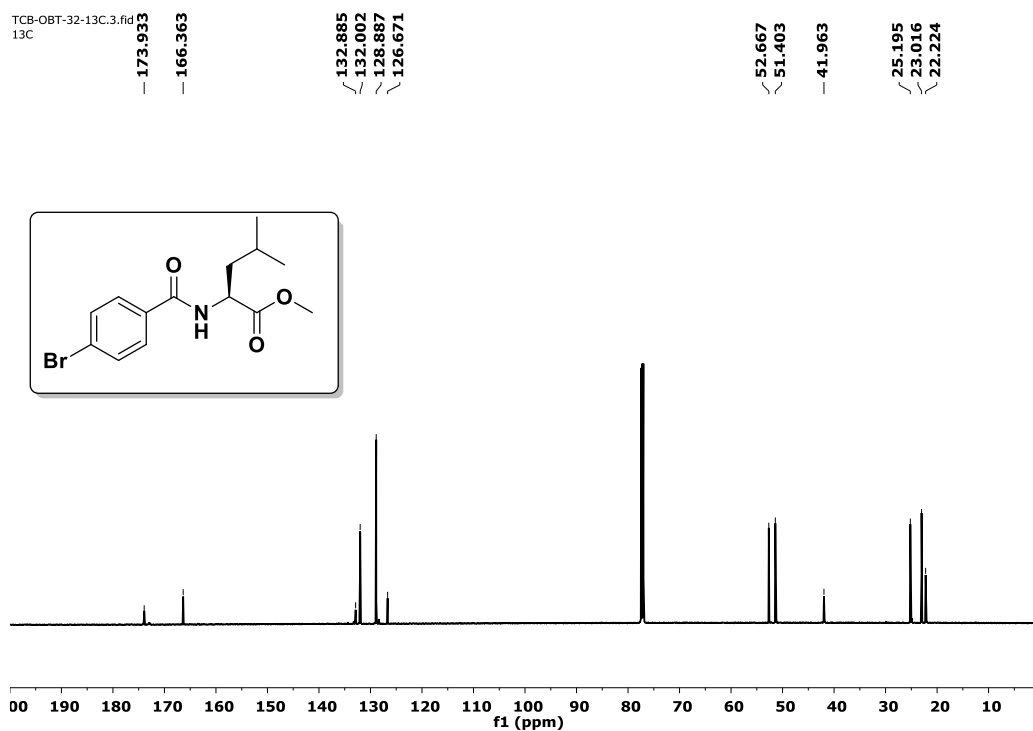

Figure S52:  $^{13}\text{C}$  NMR spectrum of compound **2m**

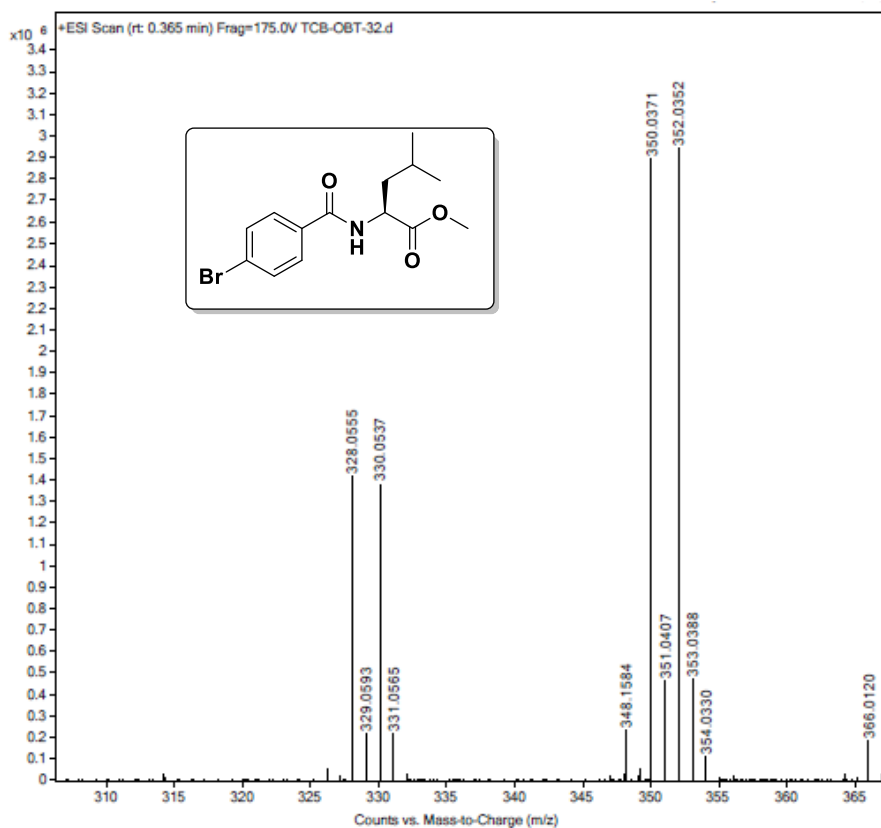

Figure S53: ESI-MASS spectrum of compound **2m**

TCB-OBT-33-1H.4.fid  
1H

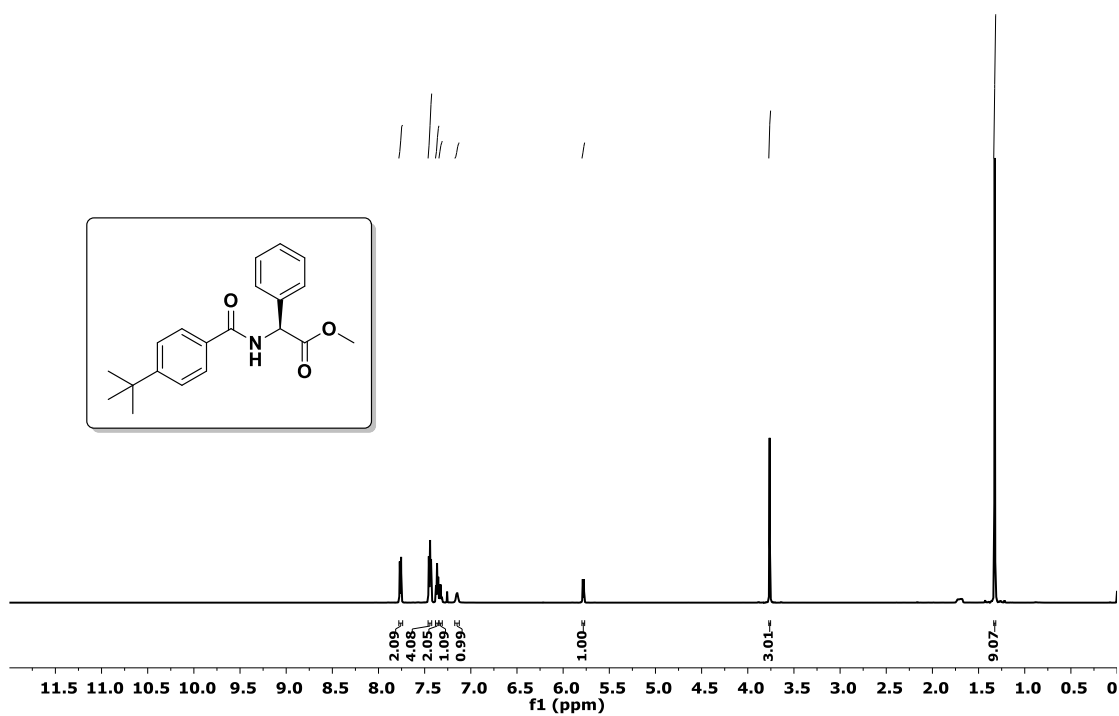

Figure S54:  $^1\text{H}$  NMR spectrum of compound 2n

TCB-OBT-33-13C.5.fid  
13C

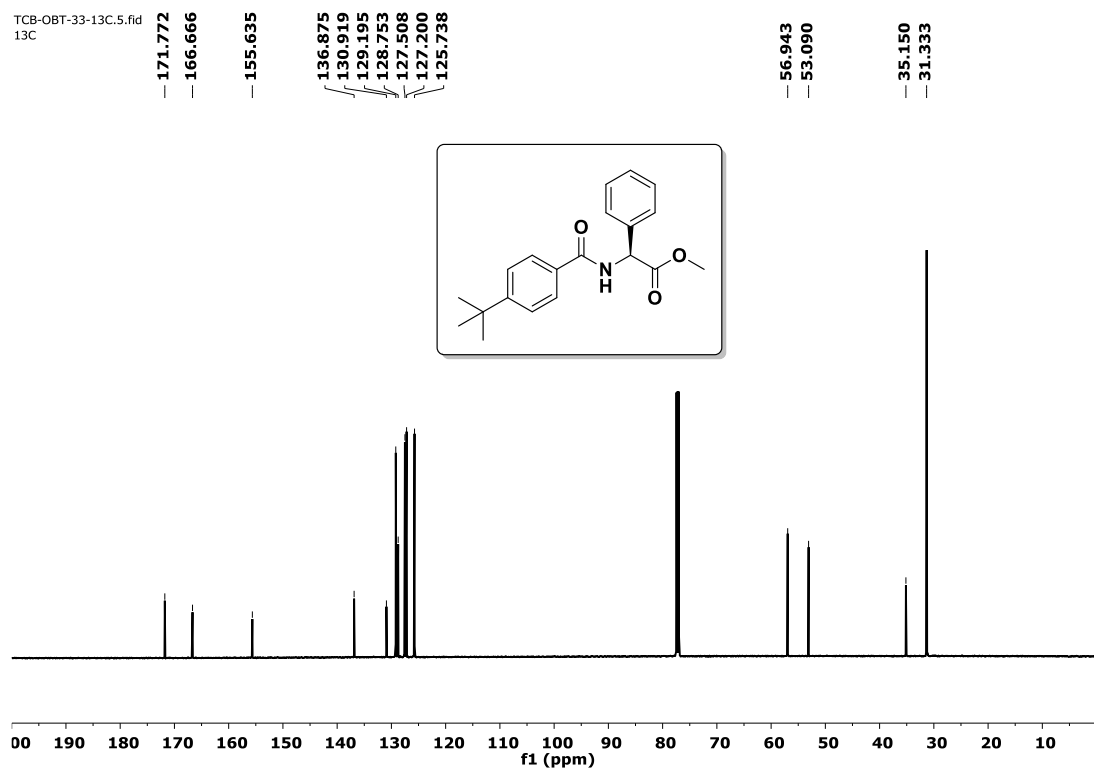

Figure S55:  $^{13}\text{C}$  NMR spectrum of compound 2n



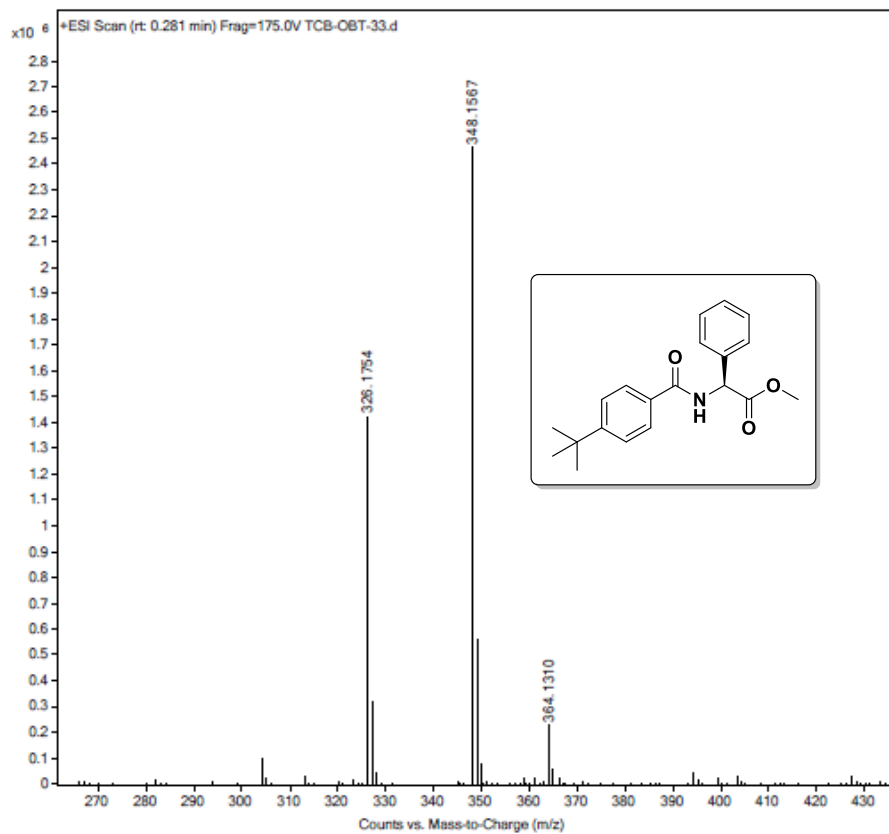

**Figure S56:** ESI-MASS spectrum of compound **2n**
